# Supplementary material for: Modelling climatically and ecologically suitable environment for benthic foraminiferal species
Source: Research Square preprint supplement (doi:10.21203/rs.3.rs-1755000/v1), 2022-06-17
Supplement: Supplementary file 1 [file 34fd2abe130bbc6edd4f17df.xlsx]

## Sheet: Supplementary Table 1
Model selection All
round	variables	m	Dsq	Chisq	df	P
1	EMEV.20	1	0.457	92.123	1	8.15e-22
1	EMEV.10	1	0.426	85.972	1	1.82e-20
1	EMEV.34	1	0.402	81.103	1	2.14e-19
1	EMEV.2	1	0.378	76.3	1	2.44e-18
1	EMEV.19	2	0.396	79.84	2	4.6e-18
1	EMEV.24	1	0.36	72.599	1	1.59e-17
1	EMEV.21	1	0.351	70.764	1	4.03e-17
1	EMEV.27	1	0.309	62.228	1	3.06e-15
1	EMEV.6	1	0.278	56.152	1	6.71e-14
1	EMEV.1	1	0.272	54.875	1	1.28e-13
1	EMEV.23	1	0.256	51.539	1	7.02e-13
1	y	1	0.251	50.657	1	1.1e-12
1	EMEV.17	1	0.247	49.876	1	1.64e-12
1	EMEV.13	1	0.224	45.224	1	1.76e-11
1	EMEV.11	1	0.212	42.754	1	6.21e-11
1	EMEV.15	1	0.192	38.656	1	5.05e-10
1	EMEV.25	1	0.168	33.979	1	5.57e-09
1	EMEV.5	1	0.162	32.742	1	1.05e-08
1	EMEV.12	1	0.133	26.883	1	2.16e-07
1	EMEV.16	1	0.125	25.159	1	5.28e-07
1	EMEV.14	1	0.111	22.474	1	2.13e-06
1	EMEV.33	1	0.105	21.211	1	4.11e-06
1	EMEV.30	1	0.102	20.573	1	5.74e-06
1	EMEV.9	1	0.098	19.75	1	8.83e-06
1	EMEV.31	1	0.07	14.083	1	0.000175
1	EMEV.29	1	0.065	13.204	1	0.000279
1	EMEV.8	1	0.059	11.919	1	0.000556
1	EMEV.26	1	0.055	11.088	1	0.000869
1	EMEV.7	1	0.054	10.914	1	0.000954
2	EMEV.20 + EMEV.2	2	0.598	28.424	1	9.74e-08
2	EMEV.20 + EMEV.1	2	0.587	26.232	1	3.03e-07
2	EMEV.20 + EMEV.17	2	0.587	26.231	1	3.03e-07
2	EMEV.20 + EMEV.6	2	0.549	18.687	1	1.54e-05
2	EMEV.20 + EMEV.13	2	0.543	17.461	1	2.93e-05
2	EMEV.20 + EMEV.27	2	0.541	16.924	1	3.89e-05
2	EMEV.20 + EMEV.26	2	0.538	16.381	1	5.18e-05
2	EMEV.20 + EMEV.19	3	0.55	18.893	2	7.9e-05
2	EMEV.20 + y	2	0.534	15.577	1	7.92e-05
2	EMEV.20 + EMEV.34	2	0.532	15.137	1	0.0001
2	EMEV.20 + EMEV.21	2	0.528	14.422	1	0.000146
2	EMEV.20 + EMEV.11	2	0.518	12.299	1	0.000453
2	EMEV.20 + EMEV.15	2	0.509	10.565	1	0.00115
2	EMEV.20 + EMEV.24	2	0.507	10.158	1	0.00144
2	EMEV.20 + EMEV.12	2	0.504	9.452	1	0.00211
2	EMEV.20 + EMEV.23	2	0.494	7.585	1	0.00589
2	EMEV.20 + EMEV.30	2	0.492	7.02	1	0.00806
2	EMEV.20 + EMEV.31	2	0.489	6.586	1	0.0103
2	EMEV.20 + EMEV.29	2	0.485	5.774	1	0.0163
2	EMEV.20 + EMEV.10	2	0.48	4.69	1	0.0303
2	EMEV.20 + EMEV.7	2	0.479	4.456	1	0.0348
2	EMEV.20 + EMEV.9	2	0.478	4.251	1	0.0392
2	EMEV.20 + EMEV.14	2	0.46	0.706	1	0.401
2	EMEV.20 + EMEV.16	2	0.459	0.477	1	0.49
2	EMEV.20 + EMEV.8	2	0.459	0.462	1	0.496
2	EMEV.20 + EMEV.33	2	0.459	0.354	1	0.552
2	EMEV.20 + EMEV.25	2	0.458	0.189	1	0.664
2	EMEV.20 + EMEV.5	2	0.457	0.073	1	0.788
3	EMEV.20 + EMEV.2 + EMEV.17	3	0.665	13.598	1	0.000226
3	EMEV.20 + EMEV.2 + EMEV.26	3	0.656	11.839	1	0.00058
3	EMEV.20 + EMEV.2 + EMEV.6	3	0.645	9.541	1	0.00201
3	EMEV.20 + EMEV.2 + EMEV.19	4	0.658	12.255	2	0.00218
3	EMEV.20 + EMEV.2 + EMEV.13	3	0.642	8.974	1	0.00274
3	EMEV.20 + EMEV.2 + y	3	0.64	8.458	1	0.00363
3	EMEV.20 + EMEV.2 + EMEV.11	3	0.627	5.903	1	0.0151
3	EMEV.20 + EMEV.2 + EMEV.27	3	0.621	4.68	1	0.0305
3	EMEV.20 + EMEV.2 + EMEV.21	3	0.605	1.529	1	0.216
3	EMEV.20 + EMEV.2 + EMEV.1	3	0.604	1.349	1	0.245
3	EMEV.20 + EMEV.2 + EMEV.34	3	0.601	0.585	1	0.444
4	EMEV.20 + EMEV.2 + EMEV.17 + EMEV.26	4	0.667	0.326	1	0.568

## Sheet: Supplementary Table 2
RV	x	y	Marine_realm	Site	Presence_Absence
1	34.9345	29.5223	Western Indo-Pacific	Gulf of Aqaba - North (Elat)	Presence
1	34.7397	29.2089	Western Indo-Pacific	Gulf of Aqaba - Ras Burka	Presence
1	34.4306	27.9768	Western Indo-Pacific	Gulf of Aqaba - Tiran & Ras Muhammad	Presence
1	33.9709	26.8011	Western Indo-Pacific	Red Sea - Bay of Safaga	Presence
1	39.4775	20.7603	Western Indo-Pacific	Red Sea - Saudi Arabia	Presence
1	39.1474	-6.21368	Western Indo-Pacific	Zanzibar - Stone Town	Presence
1	39.3425	-5.74806	Western Indo-Pacific	Zanzibar - Ras Nungwi	Presence
1	39.3939	-5.84889	Western Indo-Pacific	Zanzibar - Mnemba Atoll	Presence
1	39.5918	-5.24563	Western Indo-Pacific	Zanzibar - Misali Island	Presence
1	39.6026	-5.23339	Western Indo-Pacific	Zanzibar - Mapenduzi Wall	Presence
1	39.6472	-5.13105	Western Indo-Pacific	Zanzibar - Kokota Reef	Presence
1	39.46	-6.43806	Western Indo-Pacific	Zanzibar - Kizimkazi Beach	Presence
1	39.8173	-7.94145	Western Indo-Pacific	Zanzibar - Kinasi Pass	Presence
1	39.8253	-7.91974	Western Indo-Pacific	Zanzibar - Jina Reef	Presence
1	39.628	-5.0946	Western Indo-Pacific	Zanzibar - Haramu Passage	Presence
1	39.5926	-5.21774	Western Indo-Pacific	Zanzibar - Coral Mountain	Presence
1	39.7865	-7.94863	Western Indo-Pacific	Zanzibar - Chole Bay	Presence
1	39.1408	-6.135	Western Indo-Pacific	Zanzibar - Bawe	Presence
1	32.6906	-27.5172	Western Indo-Pacific	South Africa - Sodwana Bay	Presence
1	32.8927	-26.7957	Western Indo-Pacific	Mozambique - Ponta d'Ouro	Presence
1	32.89	-26.0507	Western Indo-Pacific	Mozambique - Inhaca	Presence
1	33.3	-25.3	Western Indo-Pacific	Mozambique - Inhambane 3	Presence
1	35.55	-23.97	Western Indo-Pacific	Mozambique - Inhambane 7	Presence
1	35.5665	-23.8379	Western Indo-Pacific	Mozambique - Tofo	Presence
1	40.0305	-16.3517	Western Indo-Pacific	Mozambique - Mafamete Island	Presence
1	39.997	-16.3447	Western Indo-Pacific	Mozambique - Angoche	Presence
1	40.0279	-16.3291	Western Indo-Pacific	Mozambique - Angoche	Presence
1	40.773	-15.0049	Western Indo-Pacific	Mozambique - Sete Paus	Presence
1	40.7458	-15.0049	Western Indo-Pacific	Mozambique - Coral Lodge	Presence
1	39.382	-4.71735	Western Indo-Pacific	Kenia - Shimoni	Presence
1	39.5836	-4.32725	Western Indo-Pacific	Kenia - Diani	Presence
1	39.85	-4	Western Indo-Pacific	Kenia - Mombasa	Presence
1	39.7679	-3.97532	Western Indo-Pacific	Kenia - Nyali	Presence
1	39.8631	-3.64248	Western Indo-Pacific	Kenia - Kilifi	Presence
1	40.0256	-3.367	Western Indo-Pacific	Kenia - Watamu	Presence
1	40.1356	-3.25368	Western Indo-Pacific	Kenia - Malindi	Presence
1	40.9083	-2.33895	Western Indo-Pacific	Kenia - Lamu	Presence
1	35.4652	-21.783	Western Indo-Pacific	Mozambique - Bazaruto	Presence
1	71.85	-5.33765	Western Indo-Pacific	Chagos	Presence
1	57.7698	-20.3647	Western Indo-Pacific	Mauritius	Presence
1	40.4524	-12.9737	Western Indo-Pacific	Quirimbas - Pemba Bay	Presence
1	40.5365	-12.8919	Western Indo-Pacific	Quirimbas - Lurio Pt. to North Pt.	Presence
1	40.5872	-12.6293	Western Indo-Pacific	Quirimbas - Manangoroshi to Lurio Pt.	Presence
1	40.5339	-12.4873	Western Indo-Pacific	Quirimbas - X Montepes Bay	Presence
1	40.5826	-12.287	Western Indo-Pacific	Quirimbas - Ibo Bay & Matemo	Presence
1	40.555	-12.0449	Western Indo-Pacific	Quirimbas - Molanduo Bay	Presence
1	40.5618	-11.9295	Western Indo-Pacific	Quirimbas - Pekawi Bay	Presence
1	40.5797	-11.6817	Western Indo-Pacific	Quirimbas - Kero-Nyuni Bay	Presence
1	40.6036	-11.5034	Western Indo-Pacific	Quirimbas - Nameguo & Luseti Bay	Presence
1	40.5448	-11.3215	Western Indo-Pacific	Quirimbas - Mazimbwa & Tambuzi Bay	Presence
1	40.6229	-11.1573	Western Indo-Pacific	Quirimbas - Mtundo Bay	Presence
1	40.6236	-10.95	Western Indo-Pacific	Quirimbas - Wazimi Pass	Presence
1	40.5643	-10.9533	Western Indo-Pacific	Quirimbas - Maiyapa Bay	Presence
1	40.5597	-10.7626	Western Indo-Pacific	Quirimbas - Tunghi Bay	Presence
1	73.4106	3.65051	Western Indo-Pacific	Maldives - F-Sector Felidhu Atoll	Presence
1	72.9082	3.71303	Western Indo-Pacific	Maldives - A-Sector Ari Atoll	Presence
1	73.4319	3.96095	Western Indo-Pacific	Maldives - S-Sector Male South	Presence
1	73.4833	4.23356	Western Indo-Pacific	Maldives - N-Sector Male North	Presence
1	92.7336	11.5594	Western Indo-Pacific	Andaman Islands - South	Presence
1	130.006	0.172983	Central Indo-Pacific	Raja Ampat - Wayag	Presence
1	130.236	-0.09655	Central Indo-Pacific	Raja Ampat - Magic Rock	Presence
1	130.25	0.104117	Central Indo-Pacific	Raja Ampat - Uranie	Presence
1	130.257	-0.1888	Central Indo-Pacific	Raja Ampat - Aljui	Presence
1	130.292	-0.256033	Central Indo-Pacific	Raja Ampat - Wofoh	Presence
1	130.296	-0.58885	Central Indo-Pacific	Raja Ampat - Fam	Presence
1	130.316	-0.273853	Central Indo-Pacific	Raja Ampat - Manare	Presence
1	130.542	-0.579967	Central Indo-Pacific	Raja Ampat - Manta Sandy	Presence
1	130.604	-0.622669	Central Indo-Pacific	Raja Ampat - Cape Mansoer	Presence
1	130.727	-0.497333	Central Indo-Pacific	Raja Ampat - Mioskon	Presence
1	130.757	-0.785733	Central Indo-Pacific	Raja Ampat - Batana	Presence
1	130.124	-0.136983	Central Indo-Pacific	Raja Ampat - Eagle Rock	Presence
1	134.367	7.29493	Central Indo-Pacific	Palau	Presence
1	145.827	-5.14678	Central Indo-Pacific	Papua New Guinea - Madang	Presence
1	119.38	11.194	Central Indo-Pacific	Palawan - Deep Rock	Presence
1	119.144	10.4947	Central Indo-Pacific	Palawan - Albaguen	Presence
1	119.125	10.43	Central Indo-Pacific	Palawan - Aquarium	Presence
1	119.97	12.0179	Central Indo-Pacific	Palawan - Okikawa Maru	Presence
1	119.212	10.4719	Central Indo-Pacific	Palawan - Mangroves, Sea Grass	Presence
1	119.876	11.4932	Central Indo-Pacific	Palawan - Linapacan	Presence
1	120.037	11.9133	Central Indo-Pacific	Palawan - Burguer Reef	Presence
1	119.182	10.4444	Central Indo-Pacific	Palawan - Tandan Patch Reef	Presence
1	119.164	10.4307	Central Indo-Pacific	Palawan - Port Barton Reef	Presence
1	119.154	10.461	Central Indo-Pacific	Palawan - German Island	Presence
1	119.955	11.6583	Central Indo-Pacific	Palawan - Running Sushi	Presence
1	119.872	5.02778	Central Indo-Pacific	Mindanao West - D5164	Presence
1	119.883	5.17083	Central Indo-Pacific	Mindanao West - D5161	Presence
1	119.9	5.19722	Central Indo-Pacific	Mindanao West - D5159	Presence
1	119.919	5.21111	Central Indo-Pacific	Mindanao West - D5160	Presence
1	120.049	5.30278	Central Indo-Pacific	Mindanao West - D5154	Presence
1	120.263	5.38194	Central Indo-Pacific	Mindanao West - D5152	Presence
1	121.042	6.1	Central Indo-Pacific	Mindanao West - D5139	Presence
1	123.759	9.88438	Central Indo-Pacific	Visayas - Cabilao, Bohol	Presence
1	123.833	11.1542	Central Indo-Pacific	Visayas - D5192	Presence
1	123.101	11.2202	Central Indo-Pacific	Visayas - Concepcion Bay, Panay	Presence
1	124.711	11.5278	Central Indo-Pacific	Visayas - D5206	Presence
1	120.959	13.5123	Central Indo-Pacific	Luzon - Puerto Galera	Presence
1	122.017	7.68396	Central Indo-Pacific	Luzon - D5132/3	Presence
1	122.104	12.7167	Central Indo-Pacific	Luzon - D5178	Presence
1	123.046	13.1875	Central Indo-Pacific	Luzon - D5217/8	Presence
1	138.185	9.61942	Central Indo-Pacific	Carolines - Yap	Presence
1	143.027	6.70871	Central Indo-Pacific	Carolines - Eauripik Atoll	Presence
1	146.138	7.4815	Central Indo-Pacific	Carolines - Elato & Lamotrek	Presence
1	151.86	7.33681	Central Indo-Pacific	Carolines - Chuuk Lagoon	Presence
1	153.744	5.33204	Central Indo-Pacific	Carolines - Nomoi Islands	Presence
1	144.791	13.5106	Central Indo-Pacific	Marianas - Guam	Presence
1	145.702	15.2113	Central Indo-Pacific	Marianas - Saipan	Presence
1	145.752	18.0971	Central Indo-Pacific	Marianas - Pagan	Presence
1	152.748	6.89243	Central Indo-Pacific	Micronesia - Losap Atoll	Presence
1	154.766	1.06797	Central Indo-Pacific	Micronesia - Kapingamarangi	Presence
1	154.918	3.85571	Central Indo-Pacific	Micronesia - Nukuoro	Presence
1	159.762	6.67492	Central Indo-Pacific	Micronesia - Mokil	Presence
1	111.747	16.4639	Central Indo-Pacific	South China Sea - Xisha Islands	Presence
1	114.51	16.0463	Central Indo-Pacific	South China Sea - Zhongsha Islands	Presence
1	114.114	22.2922	Central Indo-Pacific	South China Sea - Hongkong Harbour	Presence
1	124.085	24.4111	Central Indo-Pacific	Ryukyus - Ishigaki-Jima	Presence
1	127.853	26.6539	Central Indo-Pacific	Ryukyus - Sesoko-Jima, Minna-Jima	Presence
1	118.302	2.19364	Central Indo-Pacific	Borneo - East Kalimantan 1	Presence
1	106.613	-5.75139	Central Indo-Pacific	Jakarta - Kepulauan Seribu	Presence
1	115.493	-8.67142	Central Indo-Pacific	Bali - Nusa Penida, Lembugan	Presence
1	115.564	-8.23268	Central Indo-Pacific	Bali - Tulamben	Presence
1	115.513	-8.5267	Central Indo-Pacific	Bali - Padang Bai	Presence
1	115.24	-8.7461	Central Indo-Pacific	Bali - Sanur	Presence
1	119.283	-4.97002	Central Indo-Pacific	Sulawesi - Spermonde Shelf	Presence
1	125.254	1.50289	Central Indo-Pacific	Moluccas - Lembeh Strait	Presence
1	179.327	-16.3759	Central Indo-Pacific	Fiji - Mokaujar (Macuata Province)	Presence
1	178.844	-17.6852	Central Indo-Pacific	Fiji - Levuka	Presence
1	179.439	-17.8178	Central Indo-Pacific	Fiji - Nairai	Presence
1	179.699	-19.1589	Central Indo-Pacific	Fiji - 173A	Presence
1	-175.15	-20.9667	Central Indo-Pacific	Tonga - Tongatabu (172)	Presence
1	-174	-18.6951	Central Indo-Pacific	Tonga - Vavau	Presence
1	159.962	-9.43046	Central Indo-Pacific	Solomon Islands	Presence
1	159.572	-5.45489	Central Indo-Pacific	Solomon Islands - Otong Java	Presence
1	155.873	-7.06724	Central Indo-Pacific	Solomon Islands - Faisi	Presence
1	107.138	-2.98096	Central Indo-Pacific	Gaspar Straits	Presence
1	114.301	-22.1512	Central Indo-Pacific	Exmouth Gulf	Presence
1	133.52	-6.72416	Central Indo-Pacific	Arufa - Snellius Cruise G5-4-70	Presence
1	133.025	-7.13183	Central Indo-Pacific	Arufa - Snellius Cruise Sektor G5-4	Presence
1	120.954	-18.0981	Central Indo-Pacific	Western Australia - Latitude 18	Presence
1	115.552	-20.4258	Central Indo-Pacific	Western Australia - Latitude 20	Presence
1	114.774	-21.3959	Central Indo-Pacific	Western Australia - Latitude 21	Presence
1	113.774	-23.0156	Central Indo-Pacific	Western Australia - Latitude 23	Presence
1	113.603	-23.6375	Central Indo-Pacific	Ningaloo Reef CF/GN Sector	Presence
1	113.626	-22.6635	Central Indo-Pacific	Ningaloo Reef NB Sector	Presence
1	113.792	-22.3175	Central Indo-Pacific	Ningaloo Reef YC Sector	Presence
1	113.818	-23.0481	Central Indo-Pacific	Ningaloo Reef BB Sector	Presence
1	113.942	-21.9349	Central Indo-Pacific	Ningaloo Reef TB Sector	Presence
1	146.642	-1.9324	Central Indo-Pacific	Papua New Guinea - Admiralty (218A)	Presence
1	147.283	-9.53333	Central Indo-Pacific	Papua New Guinea - Port Moresby	Presence
1	123.783	-11.9333	Central Indo-Pacific	Timor Sea V229	Presence
1	126.562	-10.425	Central Indo-Pacific	Timor Sea V300	Presence
1	127.572	-13.8267	Central Indo-Pacific	Timor Sea V205	Presence
1	127.932	-9.695	Central Indo-Pacific	Timor Sea - Snellius Cruise Sektor G5-6	Presence
1	130.475	-12.3017	Central Indo-Pacific	Timor Sea V66	Presence
1	130.983	-12.1833	Central Indo-Pacific	Timor Sea V1	Presence
1	145.457	-14.6904	Central Indo-Pacific	GBR - Lizard Isl	Presence
1	146.447	-17.521	Central Indo-Pacific	GBR - Innisfail Sector (IN)	Presence
1	146.083	-16.7312	Central Indo-Pacific	GBR - Cains Sector (CA)	Presence
1	147.405	-18.6196	Central Indo-Pacific	GBR - Townsville Sector (TO)	Presence
1	149.684	-19.7571	Central Indo-Pacific	GBR - Whitsunday Area (WH)	Presence
1	166.732	-22.604	Central Indo-Pacific	New Caledonia	Presence
1	112.953	-25.4156	Temperate Australasia	Western Australia - Latitude 26	Presence
1	113.74	-28.5019	Temperate Australasia	Western Australia - Abrolhos	Presence
1	151.133	-34.0682	Temperate Australasia	New South Wales - Port Hacking	Presence
1	153.24	-27.3293	Temperate Australasia	Queensland - Morteton Bay	Presence
1	-177.95	-29.2622	Temperate Australasia	New Zealand - Kermadec Islands	Presence
1	129.199	29.1386	Temperate Northern Pacific	Tokara Islands - Takera-jima	Presence
1	-110.377	24.4645	Temperate Northern Pacific	Gulf of California	Presence
1	-111.019	18.754	Temperate Northern Pacific	Mexico - Socorro Island	Presence
1	-81.5676	7.74481	Temperate Northern Pacific	Panama	Presence
1	79.25	9.5	NA	Palk Bay	Presence
1	178.519	-18.1914	Pacific Ocean	Southern side - toward open ocean, Makaluva Island	Presence
1	-88.3442	22.3023	Gulf of Mexico	SSE Gulf of Mexico	Presence
1	178.514	-18.1719	Pacific Ocean	Northwestern edge - near jetty, Nukulau Island	Presence
1	178.52	-18.1878	Pacific Ocean	Eastern side, Makaluva Island	Presence
1	178.474	-18.1757	Pacific Ocean	Northwest tip, Nukubuco Reef	Presence
1	178.51	-18.1319	Pacific Ocean	Off the northern tip, Laucala Island	Presence
1	-82.3407	24.7806	Gulf of Mexico	ESE Gulf of Mexico	Presence
1	-87.8837	21.5705	Gulf of Mexico	SSE Gulf of Mexico	Presence
1	-82.8873	23.0251	Gulf of Mexico	ESE Gulf of Mexico	Presence
1	79.35	9.04	NA	Pointcalimere coastal waters, Palk Strait	Presence
1	178.517	-18.1882	Pacific Ocean	Western side - near passage, Makaluva Island	Presence
1	178.421	-18.171	Pacific Ocean	Fish Patch, due south from Nasese Tidal flat	Presence
1	178.518	-18.1847	Pacific Ocean	Northern side, Makaluva Island	Presence
1	178.474	-18.1786	Pacific Ocean	1/2 way to reef margin in microatoll zone, Nukubuco Reef	Presence
1	-81.839	12.165	Mar Caribe	Albuquerque. 44.8 Km al sur de San AndrÃ©s	Presence
1	3.2397	39.3791	NA	NA	Presence
1	-81.84	12.167	Mar Caribe	Albuquerque. 44.8 Km al sur de San AndrÃ©s	Presence
1	80.9928	14.4799	NA	Central east coast of India	Presence
1	2.4399	39.531	NA	NA	Presence
1	-81.841	12.166	Mar Caribe	Albuquerque. 44.8 Km al sur de San AndrÃ©s	Presence
1	-94.0212	18.3953	Gulf of Mexico	SSW Gulf of Mexico	Presence
1	2.6932	39.793	NA	NA	Presence
1	3.3353	39.531	NA	NA	Presence
1	3.2651	39.42	NA	NA	Presence
1	72.5	11	NA	Lakshadweep Islands	Presence
1	72.6	10.5833	NA	Kavaratti Atoll	Presence
1	3.042	39.278	NA	NA	Presence
1	73.3	8.11667	NA	Minicoy	Presence
1	2.746	39.513	NA	NA	Presence
1	72.25	10.0667	NA	Suhelipar Atoll	Presence
1	2.5223	39.4724	NA	NA	Presence
1	-81.847	12.143	Mar Caribe	Albuquerque. 44.8 Km al sur de San AndrÃ©s	Presence
1	-81.864	12.141	Mar Caribe	Albuquerque. 44.8 Km al sur de San AndrÃ©s	Presence
1	2.99	39.315	NA	NA	Presence
1	3.1124	39.865	NA	NA	Presence
1	72.3841	11.6679	NA	Lakshadweep	Presence
1	-97.4439	22.4038	Gulf of Mexico	WSW Gulf of Mexico	Presence
1	-84.1913	26.9667	Gulf of Mexico	ENE Gulf of Mexico	Presence
1	2.477	39.516	NA	NA	Presence
1	-88.9385	23.2548	Gulf of Mexico	SSE Gulf of Mexico	Presence
1	2.74	39.4292	NA	NA	Presence
1	-86.8768	29.9289	Gulf of Mexico	NNE Gulf of Mexico	Presence
1	73.3	8.11667	NA	Minicoy	Presence
1	2.7038	39.54	NA	NA	Presence
1	2.958	39.361	NA	NA	Presence
1	79.86	10.92	NA	Karaikal	Presence
1	-81.824	12.148	Mar Caribe	Albuquerque. 44.8 Km al sur de San AndrÃ©s	Presence
1	72.1833	10.85	NA	Agatti Atoll	Presence
1	3.3156	39.5204	NA	NA	Presence
1	72.6	10.5833	NA	Kavaratti Atoll	Presence
1	72.1833	10.85	NA	Agatti Atoll	Presence
1	2.974	39.352	NA	NA	Presence
1	-93.8439	18.6887	Gulf of Mexico	SSW Gulf of Mexico	Presence
1	-82.8923	23.0265	Gulf of Mexico	ESE Gulf of Mexico	Presence
1	-81.882	12.165	Mar Caribe	Albuquerque. 44.8 Km al sur de San AndrÃ©s	Presence
1	2.732	39.482	NA	NA	Presence
1	3.453	39.723	NA	NA	Presence
1	3.27	39.419	NA	NA	Presence
1	-81.881	12.154	Mar Caribe	Albuquerque. 44.8 Km al sur de San AndrÃ©s	Presence
1	2.42	39.538	NA	NA	Presence
1	37.2533	19.62	NA	NA	Presence
1	145.461	-14.6967	NA	NA	Presence
1	178.484	-18.1475	Pacific Ocean	Centre of lagoon, Laucala Bay	Presence
1	145.471	-14.6799	NA	NA	Presence
1	-81.888	12.165	Mar Caribe	Albuquerque. 44.8 Km al sur de San AndrÃ©s	Presence
1	3.147	39.328	NA	NA	Presence
1	2.6688	39.54	NA	NA	Presence
1	178.411	-18.1337	Pacific Ocean	Centre of lagoon, Suva Habour	Presence
1	178.461	-18.1424	Pacific Ocean	Estuary, Vatuwaqa River	Presence
1	-81.845	12.141	Mar Caribe	Albuquerque. 44.8 Km al sur de San AndrÃ©s	Presence
1	-81.896	12.165	Mar Caribe	Albuquerque. 44.8 Km al sur de San AndrÃ©s	Presence
1	-81.871	12.155	Mar Caribe	Albuquerque. 44.8 Km al sur de San AndrÃ©s	Presence
1	-81.832	12.149	Mar Caribe	Albuquerque. 44.8 Km al sur de San AndrÃ©s	Presence
1	-81.887	12.172	Mar Caribe	Albuquerque. 44.8 Km al sur de San AndrÃ©s	Presence
1	-86.6694	30.2504	Gulf of Mexico	NNE Gulf of Mexico	Presence
1	-83.2079	27.3017	Gulf of Mexico	ENE Gulf of Mexico	Presence

## Sheet: Supplementary Table 3
PA	X	Y
1	50.6252	26.0436
1	50.6251	26.0437
1	50.6264	26.0445
1	50.6255	26.0433
1	50.6255	26.0434
1	50.6255	26.0434
1	50.6254	26.0435
1	50.0005	26.7086
1	50.0094	26.6844
1	50.0183	26.6673
1	50.0409	26.643
1	50.1018	26.5968
1	50.0524	26.528
1	50.0277	26.5922
1	50.1091	26.5513
1	50.128	26.6253
1	50.0873	26.5026
1	50.1649	26.5474
1	48.4265	28.6589
1	48.4649	28.6935
1	53.527	24.1283
1	54.4942	24.5871
1	54.5915	24.5364
1	54.5549	24.5811
1	54.4471	24.4984
1	54.5965	24.6812
1	50.6215	26.0462
1	50.6248	26.0435
1	50.0099	25.9884
1	50.6291	26.0452
1	50.7666	24.8011
1	50.2383	26.3928
1	51.7271	24.995
1	51.6678	25.3014
1	51.5541	25.5227
1	51.6808	25.6975
1	51.5133	26.0132
1	51.3223	26.1515
1	51.7221	25.4358
1	48.3947	28.6333
1	48.3967	28.6342
1	53.5746	24.0787
1	53.9329	24.232
1	54.1578	24.3454
1	53.2262	24.1404
1	54.345	24.2857
1	54.3509	24.2797
1	53.4133	24.3414
1	53.7398	24.2519
1	51.363	26.138
1	51.6019	25.8593
1	51.6735	24.9675
1	51.8009	24.8321
1	52.004	24.7804
1	51.4586	24.3823
1	48.6537	28.6804
1	48.6538	28.6795
1	48.6527	28.6824
1	48.7778	28.8169
1	48.7773	28.8185
1	48.4026	28.596
1	48.4159	28.5615
1	48.4667	28.5221
1	48.4587	28.5184
1	48.4594	28.532
1	48.4507	28.5264
1	48.5068	28.4968
1	48.3811	28.6969
1	48.3927	28.6723
1	48.393	28.6488
1	48.3953	28.6073
1	48.4574	28.5187
1	48.4415	28.5337
1	48.4109	28.5698
1	47.8366	29.3684
1	47.8214	29.3817
1	47.8539	29.383
1	47.8758	29.3833
1	50.8823	26.0019
1	50.6155	25.9631
1	50.6165	25.9694
1	52.6139	27.4068
1	52.6076	27.4582
1	52.6189	27.4478
1	52.6223	27.4225
1	52.6454	27.4191
1	52.6428	27.4389
1	52.6554	27.4493
1	52.6684	27.4377
1	52.6642	27.4217
1	52.6328	27.4087
0	56.9167	26.3167
0	56.583	25.283
0	56.75	25.43
0	57	25.6
0	56.88	27
0	56	26.7
0	55.725	26.57
0	54.9	26.3
0	54.9	26.3
0	54.48	26.33
0	54.37	26.14
0	54	26.1
0	54.16	26.421
0	54.225	26.556
0	54.3	26.66
0	54.3	26.67
0	54.3	26.683
0	53.941	26.616
0	53.47	26.4
0	53.17	26.1
0	53.093	26.58
0	53.09	26.71
0	53.1	27.053
0	52.57	27.4
0	52.54	27.4
0	52.53	27.4
0	52.44	27.44
0	52.308	27.333
0	52.166	27.216
0	51.93	27.05
0	51.571	27.026
0	51.091	27.166
0	51.183	27.266
0	50.88	27.69
0	51	27.85
0	51.25	27.9
0	51	28.096
0	50.888	28.061
0	50.783	28.023
0	50.658	28.153
0	50.6	28.27
0	50.666	28.366
0	50.77	28.46
0	50.883	28.561
0	50.94	28.6
0	50.75	28.846
0	50.625	28.81
0	50.416	28.728
0	50.29	28.686
0	51.07	28.3
0	50.11	28.98
0	50.21	29.15
0	50.32	29.15
0	50.433	29.243
0	50.433	29.3
0	50.466	29.413
0	50.316	29.416
0	50.25	29.42
0	50.216	29.433
0	50.45	29.29
0	50.3	29.5
0	50.361	29.496
0	50.5	29.306
0	50.575	29.308
0	50.608	29.308
0	50.78	28.81
0	50.56	29.15
0	50.591	29.156
0	50.656	29
0	50.68	29.008
0	50.696	29.016
0	50.47	29.093
0	50.35	29.05
0	50.24	29
0	50.203	29.241
0	50.273	29.308
0	50.223	29.311
0	50.05	29.231
0	49.891	29.218
0	49.791	29.361
0	49.71	29.505
0	49.906	29.5
0	50.121	29.026
0	50.11	29
0	51.07	28.3
0	50.513	28.55
0	50.9	28.545
0	51	28.308
0	51.116	28.3
0	51.15	28.3
0	51.19	28.3
0	51.008	28.113
0	51.108	28.12
0	51.15	28.11
0	51.18	28.11
0	51.21	28.11
0	51.25	28
0	51.28	28
0	51.3	28
0	51.491	27.65
0	51.366	27.5
0	51.283	27.378
0	51.841	27.316
0	52.093	27.516
0	52.295	27.633
0	52.191	26.691
0	52.263	26.725
0	52.455	26.925
0	52.588	27.073
0	52.75	27.225
0	52.513	26.736
0	52.836	26.315
0	53.065	26.378
0	53.5	26
0	53.67	26.2
0	53.858	26.38
0	55.25	26
0	55.3	26.2
0	56.4	26.633
0	56.42	26.87
0	56.42	26.87
0	56.5	27.013
0	56.658	27.06
0	56.808	26.906
0	56.8	26.9
0	56.58	26.4
0	49.184	28.3787
0	49.2292	28.386
0	49.524	28.3143
0	49.6324	28.3751
0	49.5324	28.3751
0	49.0745	28.1925
0	49.4836	28.5373
0	49.3724	28.536
0	49.485	28.4389
0	49.0531	27.6966
0	49.1536	27.698
0	49.0547	27.6068
0	49.7701	27.9275
0	49.8495	27.9282
0	49.917	28.1647
0	49.9159	28.2708
0	49.918	28.0595
0	49.6529	27.5296
0	49.74	27.5304
0	50.03	27.707
0	50.0295	27.7631
0	49.9666	27.7065
0	49.7852	27.1955
0	49.7411	27.2344
0	50.0666	27.4331
0	50.223	27.4341
0	49.9085	27.432
0	50.5405	26.9881
0	50.5748	26.9882
0	50.5406	26.9574
0	50.7542	24.7638
0	50.754	24.7636
0	50.754	24.7636
0	50.7537	24.7635
0	50.7535	24.7633
0	50.7533	24.7632
0	50.7531	24.7631
0	50.7529	24.763
0	50.7527	24.7629
0	50.7525	24.7628
0	50.7523	24.7627
0	55.5	26.4503
0	50.45	28.5514
0	54.005	25.9976
0	52.1847	27.1167
0	52.75	26.6847
0	53.9842	26.3
0	50.5333	29.1667
0	55.5	26.3333
0	56.9503	26.54
0	50.2844	29.6167
0	57	26.54
0	51.7014	27.4514
0	49.3667	29.3333
0	54.4833	26.4333
0	53.9667	26.635
0	50.5	28.0333
0	54.4833	26.1333
0	54.9833	26.4667
0	51.4181	27.2
0	49.9014	29.7011
0	51.1347	27.6667
0	53.4833	26.7
0	50.0317	28.3691
0	53.9849	25.5525
0	53.4667	26.3833
0	54.9667	25.8333
0	50.2333	29.05
0	54.4833	25.975
0	55.9824	26.5675
0	56	26.54
0	52.6479	24.8712
0	52.7908	25.4785
0	52.9299	26.0107
0	53.1193	26.5409
0	55.3653	25.8308
0	55.118	26.1807
0	54.3667	24.8389
0	54.4521	25.6285
0	54.5256	26.1058
0	53.8369	26.1086
0	53.6621	25.64
0	51.6616	26.1947
0	52.0344	26.5859
0	52.4043	26.9624
0	50.8313	26.4945
0	51.2252	26.8331
0	51.5985	27.2338
0	50.4315	26.9191
0	50.7446	27.2385
0	51.1008	27.5368
0	50.1807	27.132
0	50.5364	27.5023
0	50.8811	27.7731
0	50.2833	27.734
0	50.3743	28.7404
0	50.0064	28.4439
0	49.4369	28.004
0	48.8192	28.6379
0	49.5891	28.5804
0	49.8698	28.9439
0	50.2518	29.2813
0	49.0766	28.9858
0	49.4923	29.1635
0	49.9411	29.2887
0	49.8875	29.5988
0	49.8063	29.8839
0	49.2855	29.596
0	48.9697	29.3384
0	48.5429	29.0578
0	48.3948	28.6569
0	48.5158	28.7332
0	48.5414	28.7826
0	48.6959	28.7942
0	48.7583	28.854
0	48.7876	28.9004
0	48.6885	28.9276
0	48.7276	29.0213
0	48.8457	29.1741
0	48.937	29.2977
0	51.9826	25.0297
0	52.1559	25.026
0	52.303	25.1177
0	51.874	25.3377
0	52.1041	25.3921
0	52.2877	25.433
0	51.8184	25.5557
0	52.035	25.87
0	52.2073	25.9594
0	51.8923	25.7645
0	51.8233	26.1512
0	51.405	26.256
0	51.4755	26.39
0	51.5701	26.5331
0	51.7221	25.4358
0	48.4031	29.7586
0	48.405	29.6376
0	48.2932	29.571
0	47.8495	29.3686
0	51.6522	24.438
0	52.6897	25.147
0	52.934	24.7545
0	53.2823	25.3585
0	52.6621	25.8242
0	50.6129	25.4902
0	50.8784	26.0338
0	51.1393	26.2908
0	52.3801	26.4373

## Sheet: Supplementary Table 4
layer_code	minimum	q1	median	q3	maximum	mad	mean	sd	moran	geary	EMEV_named_list	dataset_code	name	description	terrestrial	marine	freshwater	cellsize_equalarea	cellsize_lonlat	units	primary_type	primary_spatial_resolution	primary_source	start_year	start_month	start_day	end_year	end_month	end_day	derivation	month	is_surface	version	layer_url
BO_chlomean	0.01	0.086	0.151	0.27	64.565	0.117	0.378	1.412	0.79	0.049	EMEV_1	Bio-ORACLE	Chlorophyll A (mean)	Chlorophyll A concentration indicates the concentration of photosynthetic pigment chlorophyll A (the most common green chlorophyll) in oceans. Please note that in shallow water these values may reflect any kind of autotrophic biomass.	FALSE	TRUE	FALSE	7000	0.0833333	mg/m^3	Satellite (Aqua-MODIS), monthly climatologies	''	Reference: (Feldman & McClain 2010) URL: http://oceancolor.gsfc.nasa.gov/	2002	1	1	2009	12	31	mean		TRUE	1	https://bio-oracle.org/data/1.0/BO_chlomean.zip
BO_damean	0.012	0.029	0.038	0.054	0.972	0.016	0.05	0.043	0.896	0.018	EMEV_2	Bio-ORACLE	Diffuse attenuation coefficient at 490 nm (mean)	The diffuse attenuation coefficient is an indicator of water clarity. It expresses how deeply visible light in the blue to the green region of the spectrum penetrates in to the water column.	FALSE	TRUE	FALSE	7000	0.0833333	m^-1	Satellite (Aqua-MODIS), monthly climatologies	''	Reference: (Feldman & McClain 2010) URL: http://oceancolor.gsfc.nasa.gov/	2002	1	1	2009	12	31	mean		TRUE	1	https://bio-oracle.org/data/1.0/BO_damean.zip
BO_dissox	2.78	4.697	5.063	6.37	10.28	0.718	5.606	1.167	0.989	0	EMEV_3	Bio-ORACLE	Dissolved oxygen	Dissolved oxygen concentration [02]	FALSE	TRUE	FALSE	7000	0.0833333	ml/l	in situ measurement	''	World Ocean Database (2009) Reference: (Boyer et al. 2009) URL: http://www.nodc.noaa.gov/	1898	1	1	2009	12	31	DIVA interpolation (540582 data points)		TRUE	1	https://bio-oracle.org/data/1.0/BO_dissox.zip
BO_nitrate	0	1.109	2.432	5.908	46.254	2.412	4.627	5.175	0.996	0	EMEV_4	Bio-ORACLE	Nitrate	This layer contains both [NO3] and [NO3+NO2] data. By this we mean chemically reactive dissolved inorganic nitrate and nitrate or nitrite. (It is important to note that data reported as [NO3] in the WOD09 should be used with caution because it is difficult to verify that the [NO3] (nitrate) data are [NO3+NO2] or [NO3]. (Boyer et al. 2009))	FALSE	TRUE	FALSE	7000	0.0833333	micromol/L	in situ measurement	''	World Ocean Database (2009) Reference: (Boyer et al. 2009) URL: http://www.nodc.noaa.gov/	1928	1	1	2008	12	31	DIVA interpolation (189530 data points)		TRUE	1	https://bio-oracle.org/data/1.0/BO_nitrate.zip
BO_salinity	0.001	33.981	34.701	35.471	41.475	1.099	34.546	2.074	0.959	0.001	EMEV_5	Bio-ORACLE	Salinity	Salinity indicates the dissolved salt content in the ocean.	FALSE	TRUE	FALSE	7000	0.0833333	PSS	in situ measurement	''	World Ocean Database (2009) Reference: (Boyer et al. 2009) URL: http://www.nodc.noaa.gov/	1961	1	1	2009	12	31	DIVA interpolation (532377 data points)		TRUE	1	https://bio-oracle.org/data/1.0/BO_salinity.zip
BO_sstmax	-1.589	14.208	25.395	28.865	37.6	6.678	21.097	9.744	0.991	0	EMEV_6	Bio-ORACLE	Sea surface temperature (maximum)	Sea surface temperature is the temperature of the water at the ocean surface. This parameter indicates the temperature of the topmost meter of the ocean water column.	FALSE	TRUE	FALSE	7000	0.0833333	Celsius	Satellite (Aqua-MODIS), monthly climatologies	5 arcmin (9.2 km)	Reference: (Feldman & McClain 2010) URL: http://oceancolor.gsfc.nasa.gov/	2002	1	1	2009	12	31	maximum		TRUE	1	https://bio-oracle.org/data/1.0/BO_sstmax.zip
BO_sstmean	-1.801	10.489	22.046	27.093	32.918	8.881	18.519	9.957	0.992	0	EMEV_7	Bio-ORACLE	Sea surface temperature (mean)	Sea surface temperature is the temperature of the water at the ocean surface. This parameter indicates the temperature of the topmost meter of the ocean water column.	FALSE	TRUE	FALSE	7000	0.0833333	Celsius	Satellite (Aqua-MODIS), monthly climatologies	5 arcmin (9.2 km)	Reference: (Feldman & McClain 2010) URL: http://oceancolor.gsfc.nasa.gov/	2002	1	1	2009	12	31	mean		TRUE	1	https://bio-oracle.org/data/1.0/BO_sstmean.zip
BO_sstmin	-2	7.889	19.199	25.368	31.77	10.641	16.363	10.103	0.992	0	EMEV_8	Bio-ORACLE	Sea surface temperature (minimum)	Sea surface temperature is the temperature of the water at the ocean surface. This parameter indicates the temperature of the topmost meter of the ocean water column.	FALSE	TRUE	FALSE	7000	0.0833333	Celsius	Satellite (Aqua-MODIS), monthly climatologies	5 arcmin (9.2 km)	Reference: (Feldman & McClain 2010) URL: http://oceancolor.gsfc.nasa.gov/	2002	1	1	2009	12	31	minimum		TRUE	1	https://bio-oracle.org/data/1.0/BO_sstmin.zip
BO_sstrange	0.001	2.714	4.103	5.854	31.222	2.246	4.734	2.958	0.981	0.002	EMEV_9	Bio-ORACLE	Sea surface temperature (range)	Sea surface temperature is the temperature of the water at the ocean surface. This parameter indicates the temperature of the topmost meter of the ocean water column.	FALSE	TRUE	FALSE	7000	0.0833333	Celsius	Satellite (Aqua-MODIS), monthly climatologies	5 arcmin (9.2 km)	Reference: (Feldman & McClain 2010) URL: http://oceancolor.gsfc.nasa.gov/	2002	1	1	2009	12	31	range		TRUE	1	https://bio-oracle.org/data/1.0/BO_sstrange.zip
BO2_carbonphytomean_ss	0.275	0.811	1.295	1.471	17.908	0.459	1.258	0.726	0.949	0.002	EMEV_10	Bio-ORACLE	Carbon phytoplankton biomass (mean)	Mean mole concentration of phytoplankton expressed as carbon at the sea surface	FALSE	TRUE	FALSE	7000	0.0833333	micromol/m^3	Model	0.25 arcdegree	Global Ocean Biogeochemistry NON ASSIMILATIVE Hindcast (PISCES) URL: http://marine.copernicus.eu/	2000			2014			mean value at sea surface		TRUE	2	https://bio-oracle.org/data/2.0/Present.Surface.Phytoplankton.Mean.tif.zip
BO2_chlomean_bdmean	0.004	0.004	0.004	0.005	6.585	0	0.031	0.13	0.847	0.06	EMEV_11	Bio-ORACLE	Chlorophyll concentration (mean at mean depth)	Mean mass concentration of chlorophyll in sea water at mean bottom depth	FALSE	TRUE	FALSE	7000	0.0833333	mg/m^3	Model	0.25 arcdegree	Global Ocean Biogeochemistry NON ASSIMILATIVE Hindcast (PISCES) URL: http://marine.copernicus.eu/	2000			2014			mean value at mean bottom depth		FALSE	2	https://bio-oracle.org/data/2.2/Present.Benthic.Mean.Depth.Chlorophyll.Mean.tif.zip
BO2_curvelmax_ss	0	0.168	0.277	0.462	2.865	0.198	0.345	0.256	0.993	0.002	EMEV_12	Bio-ORACLE	Current velocity (maximum)	Maximum surface current velocity	FALSE	TRUE	FALSE	7000	0.0833333	m/s	Model	0.25 arcdegree	Global Ocean Physics Reanalysis ECMWF ORAP5.0 (1979-2013) URL: http://marine.copernicus.eu/	2000			2014			maximum value at sea surface		TRUE	2	https://bio-oracle.org/data/2.0/Present.Surface.Current.Velocity.Max.tif.zip
BO2_curvelmean_bdmean	0	0.002	0.005	0.013	1.253	0.005	0.015	0.038	0.891	0.066	EMEV_13	Bio-ORACLE	Current velocity (mean at mean depth)	Mean sea water velocity at mean bottom depth	FALSE	TRUE	FALSE	7000	0.0833333	m/s	Model	0.25 arcdegree	Global Ocean Physics Reanalysis ECMWF ORAP5.0 (1979-2013) URL: http://marine.copernicus.eu/	2000			2014			mean value at mean bottom depth		FALSE	2	https://bio-oracle.org/data/2.0/Present.Benthic.Mean.Depth.Current.Velocity.Mean.tif.zip
BO2_curvelmean_ss	0	0.04	0.074	0.133	1.415	0.062	0.104	0.101	0.991	0.004	EMEV_14	Bio-ORACLE	Current velocity (mean)	Mean surface current velocity	FALSE	TRUE	FALSE	7000	0.0833333	m/s	Model	0.25 arcdegree	Global Ocean Physics Reanalysis ECMWF ORAP5.0 (1979-2013) URL: http://marine.copernicus.eu/	2000			2014			mean value at sea surface		TRUE	2	https://bio-oracle.org/data/2.0/Present.Surface.Current.Velocity.Mean.tif.zip
BO2_curvelmin_ss	0	0.169	0.288	0.454	2.313	0.205	0.342	0.241	0.993	0.002	EMEV_15	Bio-ORACLE	Current velocity (minimum)	Minimum surface current velocity	FALSE	TRUE	FALSE	7000	0.0833333	m/s	Model	0.25 arcdegree	Global Ocean Physics Reanalysis ECMWF ORAP5.0 (1979-2013) URL: http://marine.copernicus.eu/	2000			2014			minimum value at sea surface		TRUE	2	https://bio-oracle.org/data/2.0/Present.Surface.Current.Velocity.Min.tif.zip
BO2_dissoxmax_ss	198.781	213.024	240.198	305.339	453.652	46.589	263.311	59.891	0.987	0	EMEV_16	Bio-ORACLE	Dissolved oxygen concentration (maximum)	Maximum dissolved oxygen concentration	FALSE	TRUE	FALSE	7000	0.0833333	micromol/m^3	Model	0.25 arcdegree	Global Ocean Biogeochemistry NON ASSIMILATIVE Hindcast (PISCES) URL: http://marine.copernicus.eu/	2000			2014			maximum value at sea surface		TRUE	2	https://bio-oracle.org/data/2.0/Present.Surface.Dissolved.oxygen.Max.tif.zip
BO2_dissoxmean_bdmean	0	164.712	201.771	233.063	415.249	51.291	200.566	52.671	0.966	0.015	EMEV_17	Bio-ORACLE	Dissolved oxygen concentration (mean at mean depth)	Mean mole concentration of dissolved molecular oxygen in sea water at mean bottom depth	FALSE	TRUE	FALSE	7000	0.0833333	micromol/m^3	Model	0.25 arcdegree	Global Ocean Biogeochemistry NON ASSIMILATIVE Hindcast (PISCES) URL: http://marine.copernicus.eu/	2000			2014			mean value at mean bottom depth		FALSE	2	https://bio-oracle.org/data/2.0/Present.Surface.Dissolved.oxygen.Mean.tif.zip
BO2_dissoxmean_ss	128.084	205.028	223.539	282.48	400.866	32.456	247.204	52.019	0.987	0	EMEV_18	Bio-ORACLE	Dissolved oxygen concentration (mean)	Mean dissolved oxygen concentration	FALSE	TRUE	FALSE	7000	0.0833333	micromol/m^3	Model	0.25 arcdegree	Global Ocean Biogeochemistry NON ASSIMILATIVE Hindcast (PISCES) URL: http://marine.copernicus.eu/	2000			2014			mean value at sea surface		TRUE	2	https://bio-oracle.org/data/2.0/Present.Surface.Dissolved.oxygen.Mean.tif.zip
BO2_dissoxmin_ss	77.474	198.268	208.124	257.854	381.9	18.85	231.395	44.72	0.988	0	EMEV_19	Bio-ORACLE	Dissolved oxygen concentration (minimum)	Minimum dissolved oxygen concentration	FALSE	TRUE	FALSE	7000	0.0833333	micromol/m^3	Model	0.25 arcdegree	Global Ocean Biogeochemistry NON ASSIMILATIVE Hindcast (PISCES) URL: http://marine.copernicus.eu/	2000			2014			minimum value at sea surface		TRUE	2	https://bio-oracle.org/data/2.0/Present.Surface.Dissolved.oxygen.Min.tif.zip
BO2_ironmean_ss	0	0	0	0	0.018	0	0	0.001	0.923	0.003	EMEV_20	Bio-ORACLE	Iron concentration (mean)	Mean mole concentration of dissolved iron at the sea surface	FALSE	TRUE	FALSE	7000	0.0833333	micromol/m^3	Model	0.25 arcdegree	Global Ocean Biogeochemistry NON ASSIMILATIVE Hindcast (PISCES) URL: http://marine.copernicus.eu/	2000			2014			mean value at sea surface		TRUE	2	https://bio-oracle.org/data/2.0/Present.Surface.Iron.Mean.tif.zip
BO2_lightbotmean_bdmean	0	0	0	0	53.588	0	0.4	3.224	0.517	0.235	EMEV_21	Bio-ORACLE	Light at bottom (mean at mean depth)	Mean light penetration in the ocean at mean bottom depth	FALSE	TRUE	FALSE	7000	0.0833333	E/m^2/year	satellite imagery	0.05 arcdegree	Globcolour (Maritorena et al. 2010)	2000			2014			mean value at mean bottom depth		FALSE	2	https://bio-oracle.org/data/2.0/Present.Benthic.Mean.Depth.Light.bottom.Mean.tif.zip
BO2_nitratemean_ss	0	0.009	1.033	7.447	108.179	1.532	5.734	8.694	0.995	0	EMEV_22	Bio-ORACLE	Nitrate concentration (mean)	Mean mole concentration of nitrate at the sea surface	FALSE	TRUE	FALSE	7000	0.0833333	micromol/m^3	Model	0.25 arcdegree	Global Ocean Biogeochemistry NON ASSIMILATIVE Hindcast (PISCES) URL: http://marine.copernicus.eu/	2000			2014			mean value at sea surface		TRUE	2	https://bio-oracle.org/data/2.0/Present.Surface.Nitrate.Mean.tif.zip
BO2_ppmax_ss	0	0.005	0.009	0.015	0.577	0.007	0.012	0.014	0.954	0.003	EMEV_23	Bio-ORACLE	Primary production (maximum)	Maximum sea surface net primary productivity of carbon	FALSE	TRUE	FALSE	7000	0.0833333	g/m^3/day	Model	0.25 arcdegree	Global Ocean Biogeochemistry NON ASSIMILATIVE Hindcast (PISCES) URL: http://marine.copernicus.eu/	2000			2014			maximum value at sea surface		TRUE	2	https://bio-oracle.org/data/2.0/Present.Surface.Primary.productivity.Max.tif.zip
BO2_ppmean_ss	0	0.001	0.003	0.006	0.258	0.003	0.004	0.006	0.948	0.003	EMEV_24	Bio-ORACLE	Primary production (mean)	Mean sea surface net primary productivity of carbon	FALSE	TRUE	FALSE	7000	0.0833333	g/m^3/day	Model	0.25 arcdegree	Global Ocean Biogeochemistry NON ASSIMILATIVE Hindcast (PISCES) URL: http://marine.copernicus.eu/	2000			2014			mean value at sea surface		TRUE	2	https://bio-oracle.org/data/2.0/Present.Surface.Primary.productivity.Mean.tif.zip
BO2_ppmin_ss	0	0	0	0.002	0.066	0.001	0.001	0.002	0.963	0.003	EMEV_25	Bio-ORACLE	Primary production (minimum)	Minimum sea surface net primary productivity of carbon	FALSE	TRUE	FALSE	7000	0.0833333	g/m^3/day	Model	0.25 arcdegree	Global Ocean Biogeochemistry NON ASSIMILATIVE Hindcast (PISCES) URL: http://marine.copernicus.eu/	2000			2014			minimum value at sea surface		TRUE	2	https://bio-oracle.org/data/2.0/Present.Surface.Primary.productivity.Min.tif.zip
BO2_salinitymax_ss	0.91	34.414	35.292	35.922	41.221	1.124	35.136	1.766	0.963	0	EMEV_26	Bio-ORACLE	Sea surface salinity (maximum)	Maximum sea surface salinity	FALSE	TRUE	FALSE	7000	0.0833333	PSS	Model	0.25 arcdegree	Global Ocean Physics Reanalysis ECMWF ORAP5.0 (1979-2013) URL: http://marine.copernicus.eu/	2000			2014			maximum value at sea surface		TRUE	2	https://bio-oracle.org/data/2.0/Present.Surface.Salinity.Max.tif.zip
BO2_salinitymean_bdmean	4.99	34.683	34.701	34.732	40.756	0.032	34.629	1.341	0.921	0.012	EMEV_27	Bio-ORACLE	Sea water salinity (mean at mean depth)	Mean sea water salinity at the bottom at mean bottom depth	FALSE	TRUE	FALSE	7000	0.0833333	PSS	Model	0.25 arcdegree	Global Ocean Physics Reanalysis ECMWF ORAP5.0 (1979-2013) URL: http://marine.copernicus.eu/	2000			2014			mean value at mean bottom depth		FALSE	2	https://bio-oracle.org/data/2.0/Present.Benthic.Mean.Depth.Salinity.Mean.tif.zip
BO2_salinitymean_ss	0.059	33.934	34.674	35.436	40.651	1.116	34.489	2.03	0.955	0	EMEV_28	Bio-ORACLE	Sea surface salinity (mean)	Mean sea surface salinity	FALSE	TRUE	FALSE	7000	0.0833333	PSS	Model	0.25 arcdegree	Global Ocean Physics Reanalysis ECMWF ORAP5.0 (1979-2013) URL: http://marine.copernicus.eu/	2000			2014			mean value at sea surface		TRUE	2	https://bio-oracle.org/data/2.0/Present.Surface.Salinity.Mean.tif.zip
BO2_salinitymin_ss	0.002	33.115	33.924	34.798	39.926	1.264	33.463	2.783	0.956	0.002	EMEV_29	Bio-ORACLE	Sea surface salinity (minimum)	Minimum sea surface salinity	FALSE	TRUE	FALSE	7000	0.0833333	PSS	Model	0.25 arcdegree	Global Ocean Physics Reanalysis ECMWF ORAP5.0 (1979-2013) URL: http://marine.copernicus.eu/	2000			2014			minimum value at sea surface		TRUE	2	https://bio-oracle.org/data/2.0/Present.Surface.Salinity.Min.tif.zip
BO2_silicatemean_ss	0.766	2.503	3.521	9.444	313.059	2.249	10.76	18.366	0.992	0	EMEV_30	Bio-ORACLE	Silicate concentration (mean)	Mean mole concentration of silicate at the sea surface	FALSE	TRUE	FALSE	7000	0.0833333	micromol/m^3	Model	0.25 arcdegree	Global Ocean Biogeochemistry NON ASSIMILATIVE Hindcast (PISCES) URL: http://marine.copernicus.eu/	2000			2014			mean value at sea surface		TRUE	2	https://bio-oracle.org/data/2.0/Present.Surface.Silicate.Mean.tif.zip
BO2_tempmax_ss	-1.74	14.921	26.245	29.285	34.76	5.798	21.624	9.724	0.991	0	EMEV_31	Bio-ORACLE	Sea surface temperature (maximum)	Maximum sea surface temperature	FALSE	TRUE	FALSE	7000	0.0833333	degrees Celcius	Model	0.25 arcdegree	Global Ocean Physics Reanalysis ECMWF ORAP5.0 (1979-2013) URL: http://marine.copernicus.eu/	2000			2014			maximum		TRUE	2	https://bio-oracle.org/data/2.0/Present.Surface.Temperature.Max.tif.zip
BO2_tempmean_ss	-1.798	10.215	21.852	27.033	30.179	8.987	18.27	10.055	0.991	0	EMEV_32	Bio-ORACLE	Sea surface temperature (mean)	Mean sea surface temperature	FALSE	TRUE	FALSE	7000	0.0833333	degrees Celcius	Model	0.25 arcdegree	Global Ocean Physics Reanalysis ECMWF ORAP5.0 (1979-2013) URL: http://marine.copernicus.eu/	2000			2014			mean		TRUE	2	https://bio-oracle.org/data/2.0/Present.Surface.Temperature.Mean.tif.zip
BO2_tempmin_ss	-1.94	7.006	18.095	24.595	29.36	10.998	15.521	10.026	0.991	0	EMEV_33	Bio-ORACLE	Sea surface temperature (minimum)	Minimum sea surface temperature	FALSE	TRUE	FALSE	7000	0.0833333	degrees Celcius	Model	0.25 arcdegree	Global Ocean Physics Reanalysis ECMWF ORAP5.0 (1979-2013) URL: http://marine.copernicus.eu/	2000			2014			min		TRUE	2	https://bio-oracle.org/data/2.0/Present.Surface.Temperature.Min.tif.zip
MS_bathy_5m	-10493	-4865	-4082	-2984	-1	1313.58	-3661.05	1644.87	0.973	0.01	EMEV_34	MARSPEC	Bathymetry	Depth of the seafloor	FALSE	TRUE	FALSE	7000	0.0833333	meters	Satellite (SRTM)	30 arcsecond	SRTM30_PLUS V6.0 reference: Becker et al. 2009 URL: http://topex.ucsd.edu/WWW_html/srtm30_plus.html	2009	1	1	2009	12	31	''		TRUE	1	https://www.lifewatch.be/sdmpredictors/MS_bathy_5m_lonlat.tif
Summary Statistics
coverage	skim_type	skim_variable	n_missing	complete_rate	.mean	.sd	.p0	.p25	.p50	.p75	.p100
Study_Area	numeric	EMEV_1	0	1	1.63	0.997	0.745	1.015	1.282	1.816	9.082
Study_Area	numeric	EMEV_2	0	1	0.144	0.04	0.099	0.116	0.131	0.158	0.348
Study_Area	numeric	EMEV_3	0	1	4.791	0.094	4.522	4.724	4.786	4.844	5.02
Study_Area	numeric	EMEV_4	0	1	1.526	0.395	0.824	1.192	1.408	1.819	2.437
Study_Area	numeric	EMEV_5	0	1	37.199	0.078	37.068	37.141	37.189	37.233	37.418
Study_Area	numeric	EMEV_6	0	1	33.232	0.581	32.023	32.828	33.153	33.666	37.117
Study_Area	numeric	EMEV_7	0	1	26.592	0.962	24.734	25.841	26.482	27.537	29.051
Study_Area	numeric	EMEV_8	0	1	19.266	1.828	15.091	17.957	19.001	20.99	22.923
Study_Area	numeric	EMEV_9	0	1	13.966	1.707	9.315	12.849	14.324	15.173	17.659
Study_Area	numeric	EMEV_10	0	1	1.203	0.209	1.036	1.112	1.158	1.237	3.159
Study_Area	numeric	EMEV_11	0	1	0.347	0.257	0.102	0.148	0.235	0.477	1.247
Study_Area	numeric	EMEV_12	0	1	0.087	0.045	0.005	0.058	0.083	0.106	0.255
Study_Area	numeric	EMEV_13	0	1	0.017	0.013	0.002	0.008	0.011	0.026	0.06
Study_Area	numeric	EMEV_14	0	1	0.053	0.027	0.01	0.029	0.047	0.075	0.117
Study_Area	numeric	EMEV_15	0	1	0.13	0.047	0.036	0.098	0.123	0.159	0.245
Study_Area	numeric	EMEV_16	0	1	230.885	8.116	215.896	223.661	231.114	235.745	261.627
Study_Area	numeric	EMEV_17	0	1	210.528	8.818	158.356	204.534	211.971	217.879	227.786
Study_Area	numeric	EMEV_18	0	1	202.069	4.269	195.637	198.703	201.558	204.487	220.396
Study_Area	numeric	EMEV_19	0	1	181.113	1.978	176.721	180.425	181.123	181.946	188.403
Study_Area	numeric	EMEV_20	0	1	0.003	0.001	0.002	0.003	0.003	0.004	0.015
Study_Area	numeric	EMEV_21	0	1	4.592	7.79	0	0.174	1.041	4.421	44.324
Study_Area	numeric	EMEV_22	0	1	0.003	0.018	0	0	0	0	0.23
Study_Area	numeric	EMEV_23	0	1	0.018	0.005	0.008	0.016	0.018	0.019	0.047
Study_Area	numeric	EMEV_24	0	1	0.005	0.003	0.004	0.004	0.005	0.005	0.03
Study_Area	numeric	EMEV_25	0	1	0.001	0.001	0.001	0.001	0.001	0.002	0.017
Study_Area	numeric	EMEV_26	0	1	38.934	0.886	32.824	38.896	39.204	39.351	39.792
Study_Area	numeric	EMEV_27	0	1	39.468	1.485	36.356	39.145	39.957	40.544	40.729
Study_Area	numeric	EMEV_28	0	1	37.895	1.709	26.547	37.787	38.416	38.737	38.972
Study_Area	numeric	EMEV_29	0	1	36.187	3.104	17.515	36.352	37.157	37.714	38.43
Study_Area	numeric	EMEV_30	0	1	2.327	0.238	1.405	2.158	2.428	2.491	2.708
Study_Area	numeric	EMEV_31	0	1	34.086	0.386	32.38	33.93	34.125	34.312	34.693
Study_Area	numeric	EMEV_32	0	1	26.901	0.899	24.507	26.181	26.844	27.811	28.281
Study_Area	numeric	EMEV_33	0	1	18.267	1.843	14.24	16.936	18.091	19.764	22.058
Study_Area	numeric	EMEV_34	0	1	-36.304	22.861	-122	-53	-32.5	-19	-2

## Sheet: forderer_n_langer_2018
RV	x	y	Marine realm	Site	References	Latitude	Longitude	Number of species per location	Coscinospira hemprichii	Monalysidium acicularis	Peneroplis pertusus	Peneroplis planatus	contains
1	48.4625	28.8072	Western Indo-Pacific	Persian Gulf - Kuwait	86	28 48 25.79 N	48 27 45.17 E	7	x		x	x	3
1	53.5289	24.1691	Western Indo-Pacific	Persian Gulf - Khor al Bazim	76	24 10 8.62 N	53 31 44.17 E	4	x	x	x	x	4
1	54.4116	24.5169	Western Indo-Pacific	Persian Gulf - Abu Dhabi region	74, 75, 77, 78	24 31 0.81 N	54 24 41.81 E	5	x	x	x	x	4
1	33.9709	26.8011	Western Indo-Pacific	Red Sea - Bay of Safaga	41	26 48 3.82 N	33 58 15.38 E	10	x			x	2
1	39.4775	20.7603	Western Indo-Pacific	Red Sea - Saudi Arabia	1	20 45 36.97 N	39 28 38.92 E	3	x	x		x	3
1	39.1474	-6.21368	Western Indo-Pacific	Zanzibar - Stone Town	100	6 12 49.24 S	39 08 50.60 E	13			x	x	2
1	39.3425	-5.74806	Western Indo-Pacific	Zanzibar - Ras Nungwi	100	5 44 53.00 S	39 20 33.00 E	13			x	x	2
1	39.3939	-5.84889	Western Indo-Pacific	Zanzibar - Mnemba Atoll	100	5 50 56.00 S	39 23 38.00 E	13			x	x	2
1	39.6026	-5.23339	Western Indo-Pacific	Zanzibar - Mapenduzi Wall	100	5 14 00.20 S	39 36 09.48 E	12			x	x	2
1	39.6472	-5.13105	Western Indo-Pacific	Zanzibar - Kokota Reef	100	5 07 51.79 S	39 38 49.74 E	13			x	x	2
1	39.46	-6.43806	Western Indo-Pacific	Zanzibar - Kizimkazi Beach	100	6 26 17.00 S	39 27 36.00 E	8			x	x	2
1	39.8173	-7.94145	Western Indo-Pacific	Zanzibar - Kinasi Pass	100	7 56 29.23 S	39 49 02.29 E	12			x	x	2
1	39.8253	-7.91974	Western Indo-Pacific	Zanzibar - Jina Reef	100	7 55 11.07 S	39 49 31.10 E	13			x	x	2
1	39.628	-5.0946	Western Indo-Pacific	Zanzibar - Haramu Passage	100	5 05 40.57 S	39 37 40.96 E	13			x	x	2
1	39.7865	-7.94863	Western Indo-Pacific	Zanzibar - Chole Bay	100	7 56 55.08 S	39 47 11.56 E	14			x	x	2
1	39.1408	-6.135	Western Indo-Pacific	Zanzibar - Bawe	100	6 08 06.00 S	39 08 27.00 E	14			x	x	2
1	32.89	-26.0507	Western Indo-Pacific	Mozambique - Inhaca	«	26 3 2.65 S	32 53 24.03 E	8			x	x	2
1	40.1356	-3.25368	Western Indo-Pacific	Kenia - Malindi	«	3 15 13.25 S	40 8 8.16 E	11			x	x	2
1	40.9083	-2.33895	Western Indo-Pacific	Kenia - Lamu	«	2 20 20.22 S	40 54 30.06 E	14			x	x	2
1	35.4652	-21.783	Western Indo-Pacific	Mozambique - Bazaruto	63	21 46 58.63 S	35 27 54.71 E	9	x			x	2
1	40.5365	-12.8919	Western Indo-Pacific	Quirimbas - Lurio Pt. to North Pt.	43	12 53 30.74 S	40 32 11.34 E	10		x	x	x	3
1	40.5872	-12.6293	Western Indo-Pacific	Quirimbas - Manangoroshi to Lurio Pt.	43	12 37 45.52 S	40 35 13.75 E	11			x	x	2
1	40.5339	-12.4873	Western Indo-Pacific	Quirimbas - X Montepes Bay	43	12 29 14.12 S	40 32 1.94 E	8		x	x	x	3
1	40.5339	-12.4873	Western Indo-Pacific	Quirimbas - Montepes Bay	43	12 29 14.12 S	40 32 1.94 E	10		x	x	x	3
1	40.5826	-12.287	Western Indo-Pacific	Quirimbas - Ibo Bay & Matemo	43, «	12 17 13.20 S	40 34 57.34 E	12		x	x	x	3
1	40.555	-12.0449	Western Indo-Pacific	Quirimbas - Molanduo Bay	43	12 2 41.66 S	40 33 18.01 E	8		x	x	x	3
1	40.5618	-11.9295	Western Indo-Pacific	Quirimbas - Pekawi Bay	43	11 55 46.34 S	40 33 42.33 E	7		x	x	x	3
1	40.5797	-11.6817	Western Indo-Pacific	Quirimbas - Kero-Nyuni Bay	43	11 40 53.95 S	40 34 46.92 E	11		x	x	x	3
1	40.6036	-11.5034	Western Indo-Pacific	Quirimbas - Nameguo & Luseti Bay	43	11 30 12.27 S	40 36 12.97 E	9		x	x	x	3
1	40.5448	-11.3215	Western Indo-Pacific	Quirimbas - Mazimbwa & Tambuzi Bay	43	11 19 17.34 S	40 32 41.32 E	11		x	x	x	3
1	40.6229	-11.1573	Western Indo-Pacific	Quirimbas - Mtundo Bay	43	11 9 26.43 S	40 37 22.35 E	10		x	x	x	3
1	40.6236	-10.95	Western Indo-Pacific	Quirimbas - Wazimi Pass	43	10 57 0.18 S	40 37 25.10 E	10		x	x	x	3
1	40.5643	-10.9533	Western Indo-Pacific	Quirimbas - Maiyapa Bay	43	10 57 11.76 S	40 33 51.38 E	11		x	x	x	3
1	40.5597	-10.7626	Western Indo-Pacific	Quirimbas - Tunghi Bay	43	10 45 45.40 S	40 33 35.01 E	10		x	x	x	3
1	72.9082	3.71303	Western Indo-Pacific	Maldives - A-Sector Ari Atoll	67	3 42 46.89 N	72 54 29.34 E	14	x		x		2
1	92.7336	11.5594	Western Indo-Pacific	Andaman Islands - South	110, 111	11 33 33.94 N	92 44 1.00 E	5	x	x			2
1	130.006	0.172983	Central Indo-Pacific	Raja Ampat - Wayag	«	0 10 22.74 N	130 0 22.38 E	21			x	x	2
1	130.236	-0.09655	Central Indo-Pacific	Raja Ampat - Magic Rock	«	0 5 47.58 S	130 14 9.66 E	21		x	x	x	3
1	130.25	0.104117	Central Indo-Pacific	Raja Ampat - Uranie	«	0 6 14.82 N	130 15 0.16 E	19			x	x	2
1	130.316	-0.273853	Central Indo-Pacific	Raja Ampat - Manare	«	0 16 25.87 S	130 18 59.19 E	12			x	x	2
1	130.542	-0.579967	Central Indo-Pacific	Raja Ampat - Manta Sandy	«	0 34 47.88 S	130 32 32.04 E	17			x	x	2
1	130.604	-0.622669	Central Indo-Pacific	Raja Ampat - Cape Mansoer	«	0 37 21.61 S	130 36 13.26 E	16			x	x	2
1	130.727	-0.497333	Central Indo-Pacific	Raja Ampat - Mioskon	«	0 29 50.40 S	130 43 37.62 E	19			x	x	2
1	134.367	7.29493	Central Indo-Pacific	Palau	37, 38, 51, 66	7 17 41.73 N	134 22 2.28 E	28	x	x	x	x	4
1	119.38	11.194	Central Indo-Pacific	Palawan - Deep Rock	«	11 11 38.40 N	119 22 46.40 E	25		x		x	2
1	119.125	10.43	Central Indo-Pacific	Palawan - Aquarium	«	10 25 47.98 N	119 7 28.61 E	15			x	x	2
1	119.876	11.4932	Central Indo-Pacific	Palawan - Linapacan	«	11 29 35.38 N	119 52 32.63 E	23		x	x	x	3
1	120.037	11.9133	Central Indo-Pacific	Palawan - Burguer Reef	«	11 54 47.72 N	120 2 13.51 E	17		x	x	x	3
1	119.154	10.461	Central Indo-Pacific	Palawan - German Island	«	10 27 39.63 N	119 9 14.19 E	17			x	x	2
1	119.955	11.6583	Central Indo-Pacific	Palawan - Running Sushi	«	11 39 29.76 N	119 57 17.99 E	22			x	x	2
1	119.9	5.19722	Central Indo-Pacific	Mindanao West - D5159	22	5 11 50.00 N	119 54 0.00 E	12	x		x		2
1	120.049	5.30278	Central Indo-Pacific	Mindanao West - D5154	22	5 18 10.00 N	120 2 55.00 E	12	x		x		2
1	123.759	9.88438	Central Indo-Pacific	Visayas - Cabilao, Bohol	89, 96	9 53 3.78 N	123 45 33.72 E	17			x	x	2
1	123.833	11.1542	Central Indo-Pacific	Visayas - D5192	22	11 9 15.00 N	123 49 60.00 E	10		x		x	2
1	123.101	11.2202	Central Indo-Pacific	Visayas - Concepcion Bay, Panay	71	11 13 12.78 N	123 6 3.68 E	4		x		x	2
1	120.959	13.5123	Central Indo-Pacific	Luzon - Puerto Galera	32	13 30 44.35 N	120 57 31.21 E	29	x	x	x	x	4
1	123.046	13.1875	Central Indo-Pacific	Luzon - D5217/8	22	13 11 15.00 N	123 2 45.00 E	15	x		x	x	3
1	144.791	13.5106	Central Indo-Pacific	Marianas - Guam	53, 66	13 30 38.29 N	144 47 27.16 E	14		x	x		2
1	145.702	15.2113	Central Indo-Pacific	Marianas - Saipan	29, 101	15 12 40.55 N	145 42 5.53 E	14		x	x		2
1	111.747	16.4639	Central Indo-Pacific	South China Sea - Xisha Islands	12, 113	16 27 49.89 N	111 44 50.51 E	21		x		x	2
1	124.085	24.4111	Central Indo-Pacific	Ryukyus - Ishigaki-Jima	30, 39, 40, 66	24 24 40.12 N	124 5 7.26 E	33		x	x	x	3
1	127.853	26.6539	Central Indo-Pacific	Ryukyus - Sesoko-Jima, Minna-Jima	50, 52, 108, 109	26 39 14.04 N	127 51 10.56 E	35			x	x	2
1	115.24	-8.7461	Central Indo-Pacific	Bali - Sanur	90	8 44 45.96 S	115 14 25.24 E	15			x	x	2
1	119.283	-4.97002	Central Indo-Pacific	Sulawesi - Spermonde Shelf	16, 89, 91, 95, 96	4 58 12.08 S	119 16 59.03 E	27	x		x	x	3
1	179.327	-16.3759	Central Indo-Pacific	Fiji - Mokaujar (Macuata Province)	24, 103	16 22 33.42 S	179 19 35.57 E	11		x		x	2
1	178.844	-17.6852	Central Indo-Pacific	Fiji - Levuka	24, 103	17 41 6.56 S	178 50 37.11 E	9		x		x	2
1	179.439	-17.8178	Central Indo-Pacific	Fiji - Nairai	24, 103	17 49 4.09 S	179 26 18.92 E	10		x		x	2
1	159.962	-9.43046	Central Indo-Pacific	Solomon Islands	56	9 25 49.66 S	159 57 42.33 E	19		x	x	x	3
1	159.572	-5.45489	Central Indo-Pacific	Solomon Islands - Otong Java	57	5 27 17.61 S	159 34 18.96 E	12			x	x	2
1	155.873	-7.06724	Central Indo-Pacific	Solomon Islands - Faisi	33	7 4 2.07 S	155 52 21.73 E	5			x	x	2
1	107.138	-2.98096	Central Indo-Pacific	Gaspar Straits	19, 20, 21	2 58 51.44 S	107 8 18.51 E	8	x			x	2
1	114.301	-22.1512	Central Indo-Pacific	Exmouth Gulf	36	22 9 4.41 S	114 18 1.87 E	14		x		x	2
1	113.626	-22.6635	Central Indo-Pacific	Ningaloo Reef NB Sector	84	22 39 48.74 S	113 37 32.20 E	14		x		x	2
1	113.818	-23.0481	Central Indo-Pacific	Ningaloo Reef BB Sector	84	23 2 53.00 S	113 49 5.39 E	16		x		x	2
1	113.942	-21.9349	Central Indo-Pacific	Ningaloo Reef TB Sector	84	21 56 5.53 S	113 56 31.15 E	15		x		x	2
1	146.642	-1.9324	Central Indo-Pacific	Papua New Guinea - Admiralty (218A)	8	1 55 56.64 S	146 38 31.60 E	11	x		x	x	3
1	147.283	-9.53333	Central Indo-Pacific	Papua New Guinea - Port Moresby	34, 35	9 31 60.00 S	147 16 60.00 E	7			x	x	2
1	145.457	-14.6904	Central Indo-Pacific	GBR - Lizard Isl	3, 65	14 41 25.57 S	145 27 25.69 E	24		x	x	x	3
1	146.447	-17.521	Central Indo-Pacific	GBR - Innisfail Sector (IN)	81	17 31 15.69 S	146 26 48.24 E	15			x	x	2
1	146.083	-16.7312	Central Indo-Pacific	GBR - Cains Sector (CA)	81	16 43 52.16 S	146 4 59.24 E	13			x	x	2
1	147.405	-18.6196	Central Indo-Pacific	GBR - Townsville Sector (TO)	81	18 37 10.42 S	147 24 16.45 E	15			x	x	2
1	149.684	-19.7571	Central Indo-Pacific	GBR - Whitsunday Area (WH)	81	19 45 25.50 S	149 41 1.83 E	14			x	x	2
1	152.132	-23.6289	Central Indo-Pacific	GBR - Capricorn Bunker Group (CB)	81	23 37 44.06 S	152 7 54.36 E	12			x	x	2
1	166.732	-22.604	Central Indo-Pacific	New Caledonia	27	22 36 14.53 S	166 43 53.52 E	37	x	x	x	x	4
1	151.133	-34.0682	Temperate Australasia	New South Wales - Port Hacking	2	34 4 5.51 S	151 7 57.03 E	3		x		x	2
1	153.24	-27.3293	Temperate Australasia	Queensland - Morteton Bay	80	27 19 45.46 S	153 14 22.89 E	9		x		x	2
