# Supplementary material for: Modelling climatically and ecologically suitable environment for benthic foraminiferal species
Source: Research Square preprint supplement (doi:10.21203/rs.3.rs-1755000/v1), 2022-06-17
Supplement: Supplementary file 2 [file f055c97ae3d5290016804ccb.docx]

**Supplementary Figures**


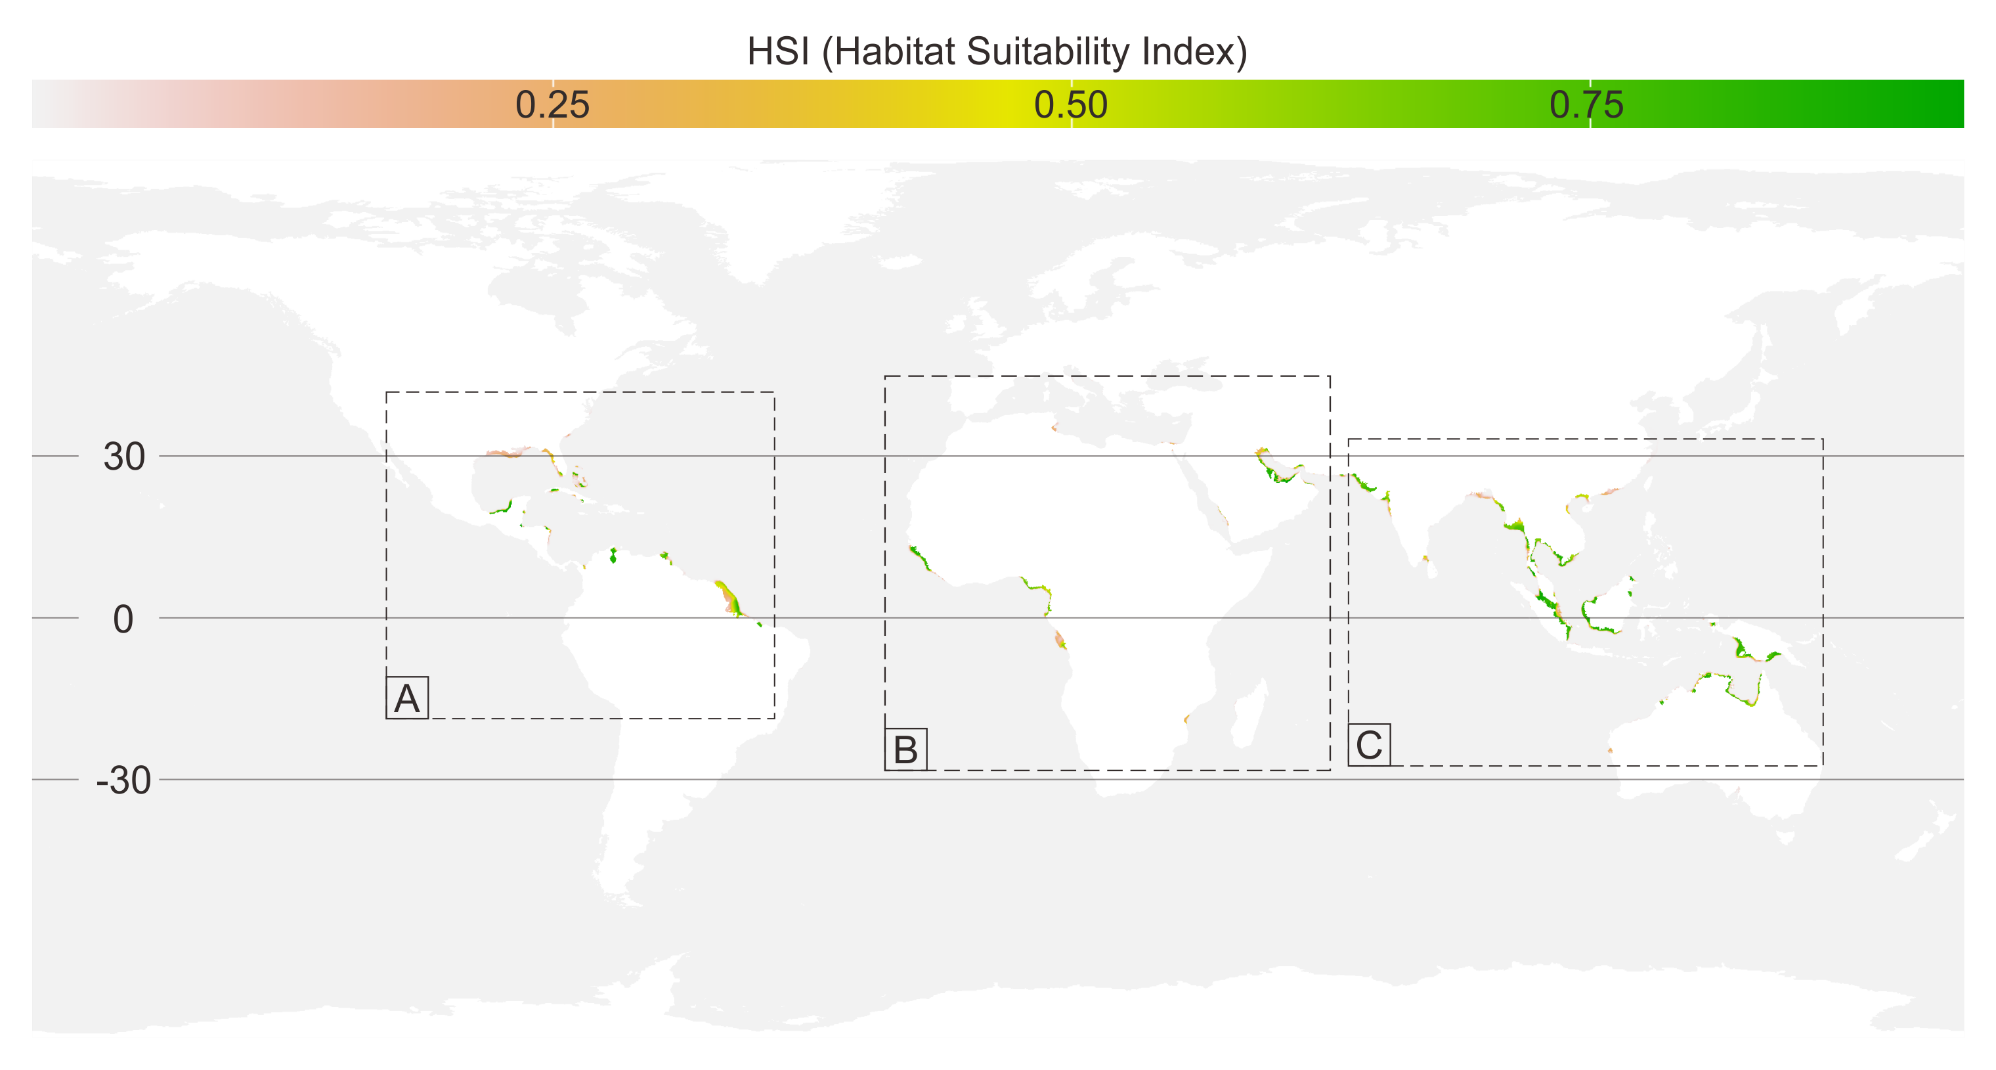


Figure 1. Spatial extrapolation of over a global extent. Inset images (A, B, and C) are shown in detail in figure 8, 9, and 10 respectively.


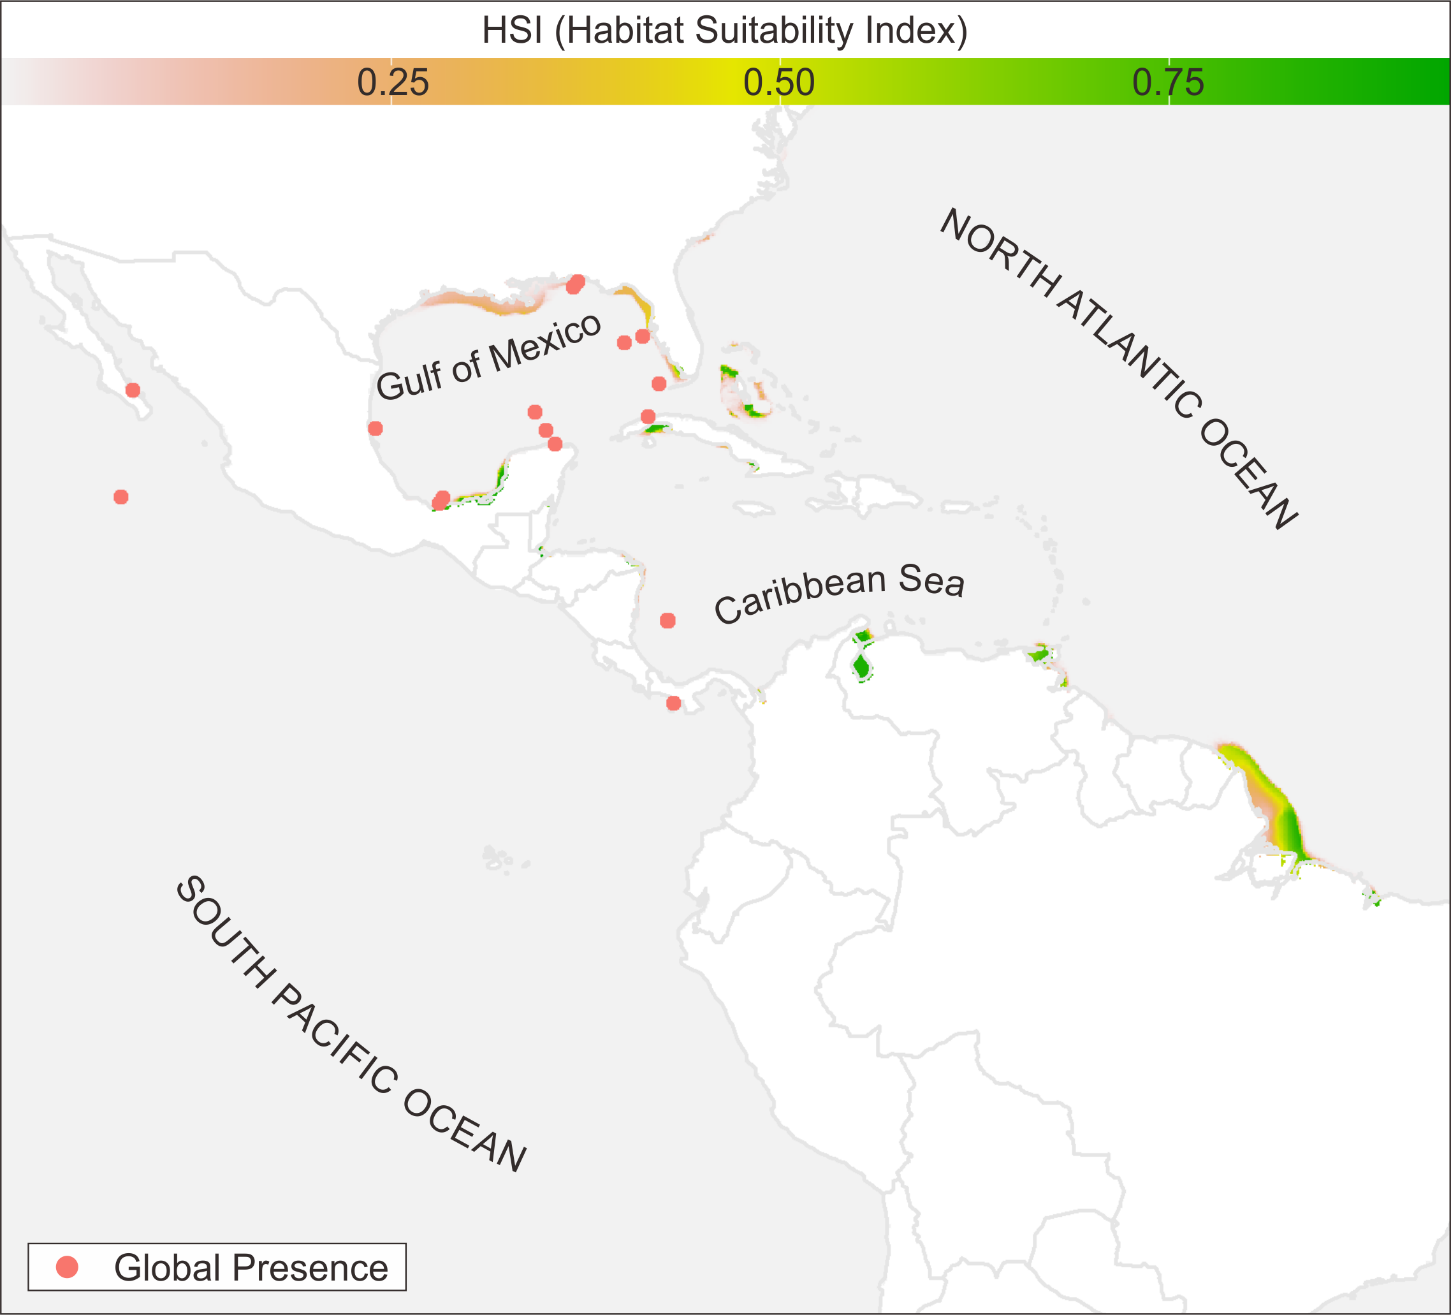

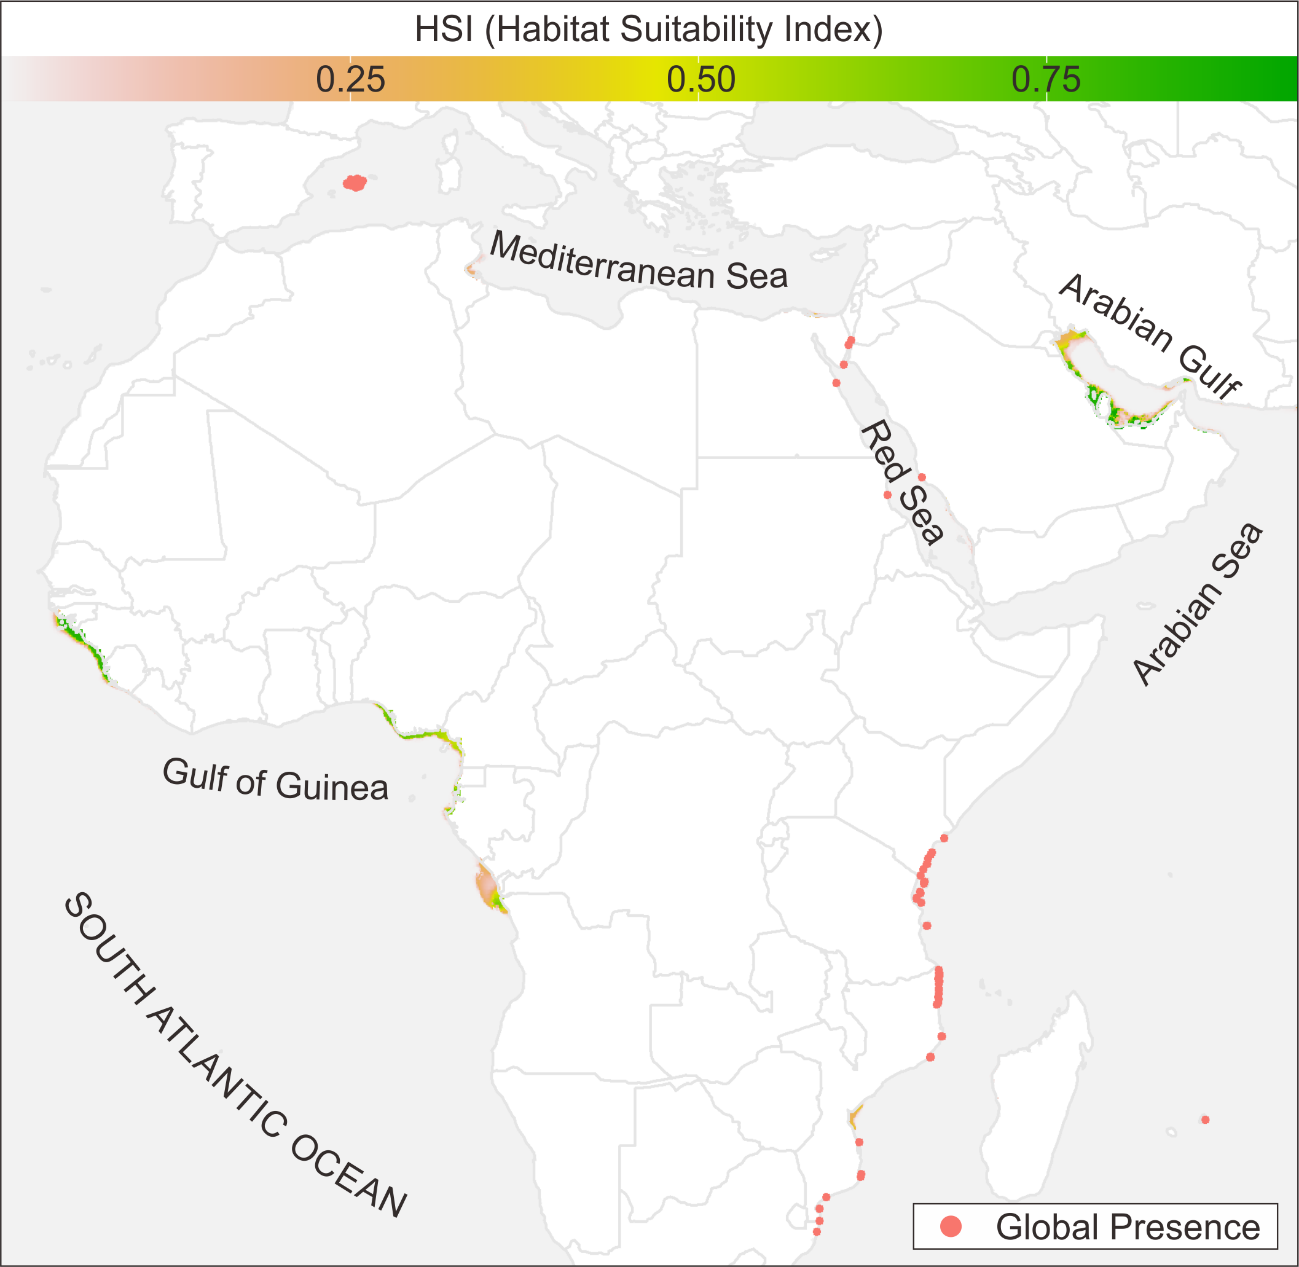


Figure 2. Temperate North Atlantic and South Pacific realm

Figure 3. Temperate South Atlantic, Mediterranean, and Arabian Peninsula


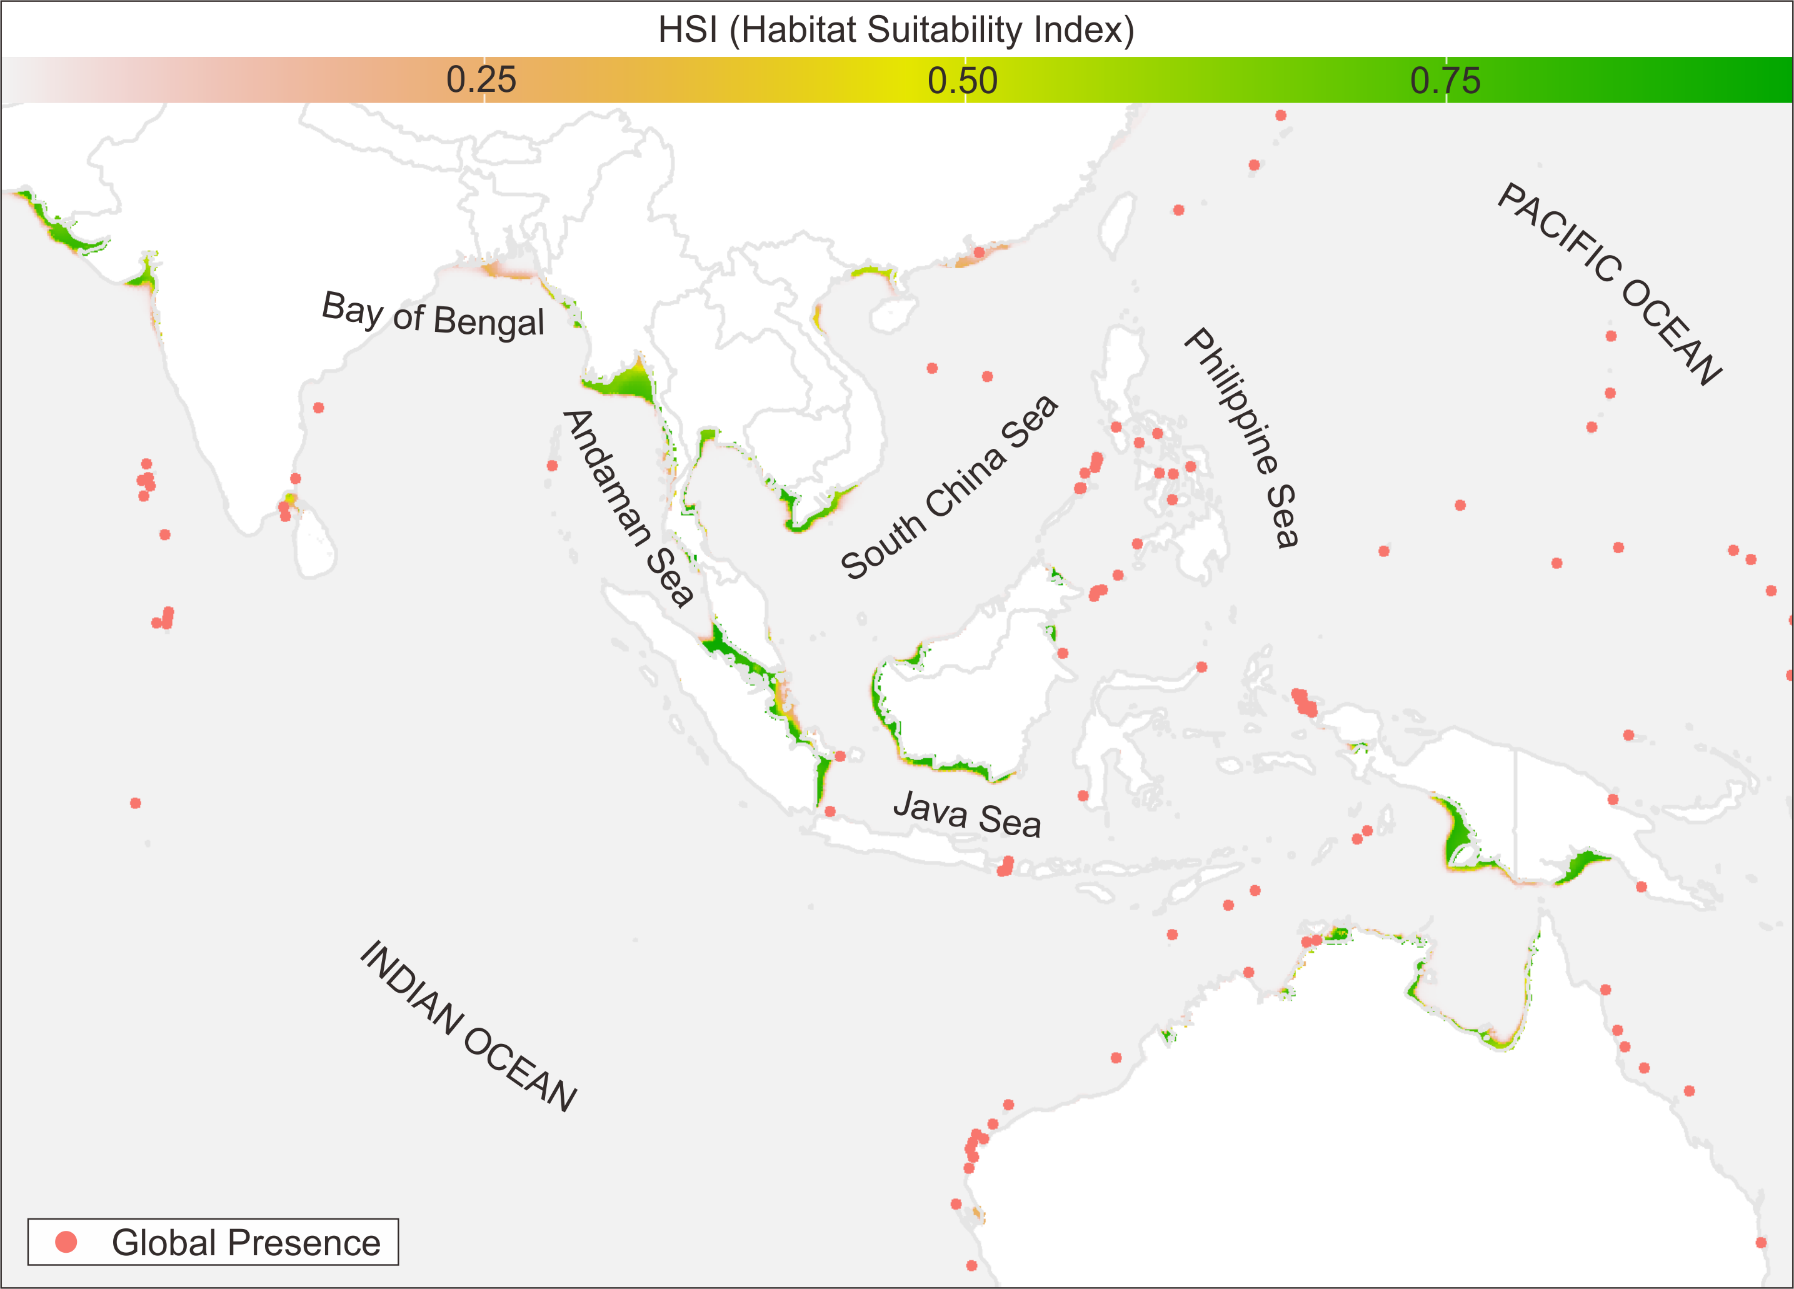


Figure 4. Temperate Indo-pacific realm with several hot spots for the four species.


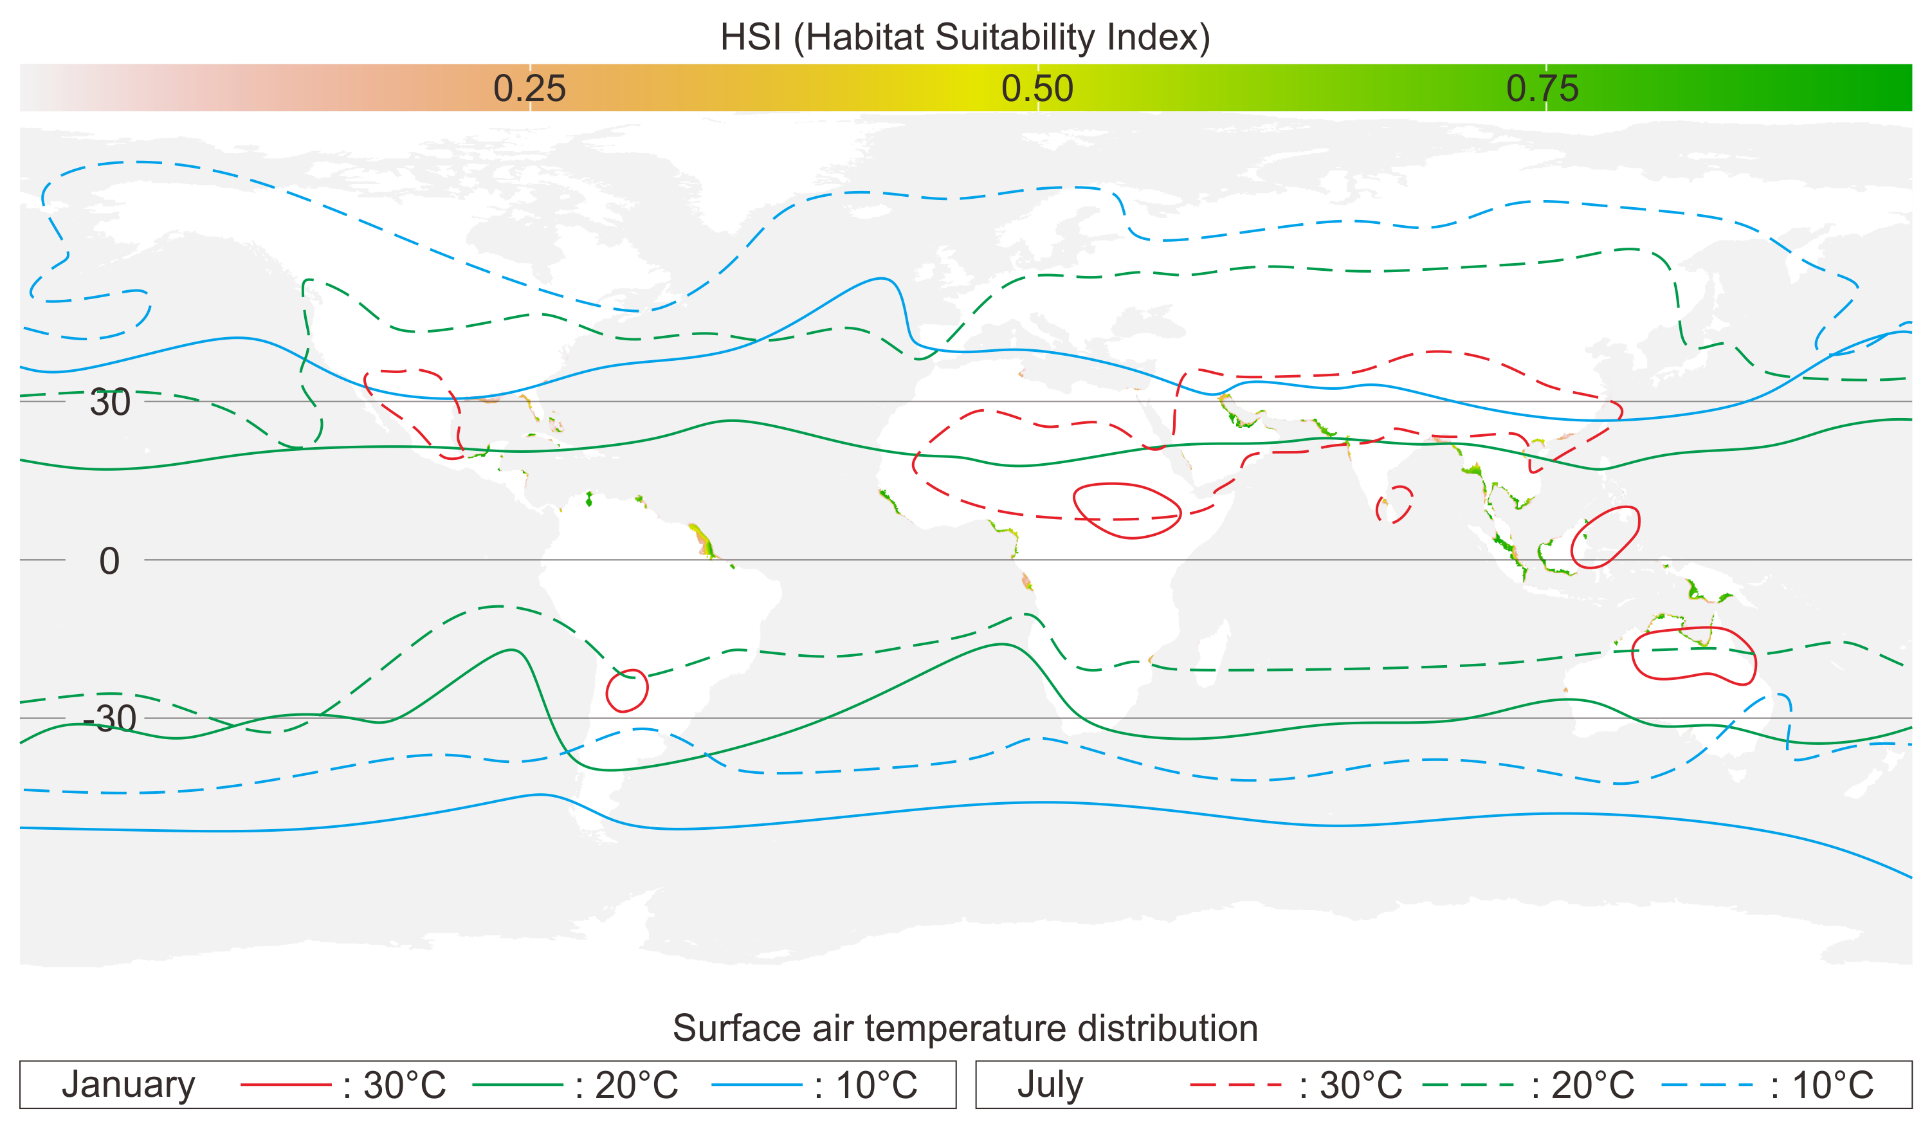


Figure 5. Spatial extrapolation of over a global extent overlain with surface air temperature distribution during the month of January and July.
